# Supplementary material for: Plant miRNAs Reduce Cancer Cell Proliferation by Targeting MALAT1 and NEAT1: A Beneficial Cross-Kingdom Interaction
Source: Front Genet. 2020 Sep 18;11:552490. doi: 10.3389/fgene.2020.552490 (PMC7531330; doi:10.3389/fgene.2020.552490)
Supplement: Supplementary file 7 [file Table_3.xlsx]

## Sheet: 72h_HCT116-WT-vs-CTRL
Supplementary Table S3. Statistical analysis of RNA-seq data from HTC116 p53+/+ transfected cell line
ENSEMBL ID	case_72h_HCT116 p53wt_MIX	ctrl_72h_HCT116 p53wt_CTRL	log2FC	Fisher's p-value	Adjusted p-value	Associated Gene Name	Description	Phenotype description	Gene Biotype
ENSG00000206585	19382.7	33939	-0.808	0	0	RNVU1-7	RNA, variant U1 small nuclear 7 [Source:HGNC Symbol;Acc:HGNC:37500]		snRNA
ENSG00000206596	6749.32	11517.7	-0.771	0	0	RNU1-27P	RNA, U1 small nuclear 27, pseudogene [Source:HGNC Symbol;Acc:HGNC:37497]		snRNA
ENSG00000207005	6749.32	11517.7	-0.771	0	0	RNU1-2	RNA, U1 small nuclear 2 [Source:HGNC Symbol;Acc:HGNC:10123]		snRNA
ENSG00000207389	6749.32	11517.7	-0.771	0	0	RNU1-4	RNA, U1 small nuclear 4 [Source:HGNC Symbol;Acc:HGNC:10128]		snRNA
ENSG00000273768	6749.32	11517.7	-0.771	0	0	RF00003			snRNA
ENSG00000206588	10137.1	15492.6	-0.612	0	0	RNU1-28P	RNA, U1 small nuclear 28, pseudogene [Source:HGNC Symbol;Acc:HGNC:37498]		snRNA
ENSG00000206652	10137.1	15492.6	-0.612	0	0	RNU1-1	RNA, U1 small nuclear 1 [Source:HGNC Symbol;Acc:HGNC:10120]		snRNA
ENSG00000206737	10137.1	15492.6	-0.612	0	0	RNVU1-18	RNA, variant U1 small nuclear 18 [Source:HGNC Symbol;Acc:HGNC:37496]		snRNA
ENSG00000207513	10137.1	15492.6	-0.612	0	0	RNU1-3	RNA, U1 small nuclear 3 [Source:HGNC Symbol;Acc:HGNC:10130]		snRNA
ENSG00000275405	10137.1	15492.6	-0.612	0	0	RF00003			snRNA
ENSG00000202198	0	142.96	-7.17	0	0	RF00100			misc_RNA
ENSG00000251562	7157.58	10995	-0.619	0	0	MALAT1	metastasis associated lung adenocarcinoma transcript 1 (non-protein coding) [Source:HGNC Symbol;Acc:HGNC:29665]		lincRNA
ENSG00000202538	1617.35	3281.61	-1.02	0	0	RNU4-2	RNA, U4 small nuclear 2 [Source:HGNC Symbol;Acc:HGNC:10193]		snRNA
ENSG00000278249	1133.5	307.74	1.878	0	0	SCARNA2	small Cajal body-specific RNA 2 [Source:HGNC Symbol;Acc:HGNC:32558]		scaRNA
ENSG00000270722	3860.61	6235.54	-0.692	0	0	RF00003			snRNA
ENSG00000277918	3161.89	5074.19	-0.682	0	0	RF00003			snRNA
ENSG00000203812	2602.55	1329.05	0.969	0	0	HIST2H2AA3	histone cluster 2 H2A family member a3 [Source:HGNC Symbol;Acc:HGNC:4736]		protein_coding
ENSG00000273730	694.17	188.96	1.872	0	0	RNA5-8SN2	RNA, 5.8S ribosomal N2 [Source:HGNC Symbol;Acc:HGNC:53521]		rRNA
ENSG00000274917	694.17	188.96	1.872	0	0	RNA5-8SN3	RNA, 5.8S ribosomal N3 [Source:HGNC Symbol;Acc:HGNC:53525]		rRNA
ENSG00000275215	694.17	188.96	1.872	0	0	RNA5-8SN1	RNA, 5.8S ribosomal N1 [Source:HGNC Symbol;Acc:HGNC:53517]		rRNA
ENSG00000275757	694.17	188.96	1.872	0	0	RNA5-8SN4	RNA, 5.8S ribosomal N4 [Source:HGNC Symbol;Acc:HGNC:53529]		rRNA
ENSG00000276700	694.17	188.96	1.872	0	0	RNA5-8SN4	RNA, 5.8S ribosomal N4 [Source:HGNC Symbol;Acc:HGNC:53529]		rRNA
ENSG00000277739	694.17	188.96	1.872	0	0	RNA5-8SN4	RNA, 5.8S ribosomal N4 [Source:HGNC Symbol;Acc:HGNC:53529]		rRNA
ENSG00000278189	694.17	188.96	1.872	0	0	RNA5-8SN4	RNA, 5.8S ribosomal N4 [Source:HGNC Symbol;Acc:HGNC:53529]		rRNA
ENSG00000278233	694.17	188.96	1.872	0	0	RNA5-8SN4	RNA, 5.8S ribosomal N4 [Source:HGNC Symbol;Acc:HGNC:53529]		rRNA
ENSG00000259001	3143.6	1824.04	0.785	0	0	AL355075.4			antisense
ENSG00000200795	1171.99	2142.19	-0.87	0	0	RNU4-1	RNA, U4 small nuclear 1 [Source:HGNC Symbol;Acc:HGNC:10192]		snRNA
ENSG00000203852	442.87	110.95	1.987	0	0	HIST2H3A	histone cluster 2 H3 family member a [Source:HGNC Symbol;Acc:HGNC:20505]		protein_coding
ENSG00000124762	2483.68	1542.89	0.686	0	0	CDKN1A	cyclin dependent kinase inhibitor 1A [Source:HGNC Symbol;Acc:HGNC:1784]	Multiple endocrine neoplasia type 1	protein_coding
ENSG00000259040	282.08	59.65	2.223	0	0	BLOC1S5-TXNDC5	BLOC1S5-TXNDC5 readthrough (NMD candidate) [Source:HGNC Symbol;Acc:HGNC:42001]		protein_coding
ENSG00000200320	1105.48	1863.38	-0.753	0	0	SNORA63	small nucleolar RNA, H/ACA box 63 [Source:HGNC Symbol;Acc:HGNC:10106]		snoRNA
ENSG00000207445	447.23	914.55	-1.03	0	0	SNORD15B	small nucleolar RNA, C/D box 15B [Source:HGNC Symbol;Acc:HGNC:16649]		snoRNA
ENSG00000203811	1651.24	1002.63	0.719	0	0	HIST2H3C	histone cluster 2 H3 family member c [Source:HGNC Symbol;Acc:HGNC:20503]		protein_coding
ENSG00000273590	7.58	99.69	-3.553	0	0	SMIM11B	small integral membrane protein 11B [Source:HGNC Symbol;Acc:HGNC:51846]		protein_coding
ENSG00000245532	1068.86	1699.98	-0.669	0	0	NEAT1	nuclear paraspeckle assembly transcript 1 (non-protein coding) [Source:HGNC Symbol;Acc:HGNC:30815]		lincRNA
ENSG00000199785	272.45	615.82	-1.174	0	0	SNORA52	small nucleolar RNA, H/ACA box 52 [Source:HGNC Symbol;Acc:HGNC:32645]		snoRNA
ENSG00000205670	101.18	10.06	3.208	0	0	SMIM11A	small integral membrane protein 11A [Source:HGNC Symbol;Acc:HGNC:1293]		protein_coding
ENSG00000198743	632.67	1091.54	-0.786	0	0	SLC5A3	solute carrier family 5 member 3 [Source:HGNC Symbol;Acc:HGNC:11038]		protein_coding
ENSG00000205609	1302.63	802.45	0.698	0	0	EIF3CL	eukaryotic translation initiation factor 3 subunit C like [Source:HGNC Symbol;Acc:HGNC:26347]		protein_coding
ENSG00000015568	120.36	17.48	2.715	0	0	RGPD5	RANBP2-like and GRIP domain containing 5 [Source:HGNC Symbol;Acc:HGNC:32418]		protein_coding
ENSG00000099994	469.73	209.81	1.159	0	0	SUSD2	sushi domain containing 2 [Source:HGNC Symbol;Acc:HGNC:30667]		protein_coding
ENSG00000278828	1309.82	836	0.647	0	0	HIST1H3H	histone cluster 1 H3 family member h [Source:HGNC Symbol;Acc:HGNC:4775]		protein_coding
ENSG00000283029	142.21	356.04	-1.318	0	0	AL139099.4
ENSG00000285505	26.88	132.56	-2.26	0	0	AC010616.2			protein_coding
ENSG00000183598	1134.96	717.51	0.661	0	0	HIST2H3D	histone cluster 2 H3 family member d [Source:HGNC Symbol;Acc:HGNC:25311]		protein_coding
ENSG00000099977	876.74	517.44	0.76	0	0	DDT	D-dopachrome tautomerase [Source:HGNC Symbol;Acc:HGNC:2732]		protein_coding
ENSG00000257411	12.84	89.75	-2.713	0	0	AC034102.2			protein_coding
ENSG00000196866	703.91	406.91	0.789	0	0	HIST1H2AD	histone cluster 1 H2A family member d [Source:HGNC Symbol;Acc:HGNC:4729]		protein_coding
ENSG00000221420	166.77	361.78	-1.113	0	0	SNORA81	small nucleolar RNA, H/ACA box 81 [Source:HGNC Symbol;Acc:HGNC:32667]		snoRNA
ENSG00000134755	665.69	1008.15	-0.598	0	0	DSC2	desmocollin 2 [Source:HGNC Symbol;Acc:HGNC:3036]	Familial isolated arrhythmogenic ventricular dysplasia biventricular form,Familial isolated arrhythmogenic ventricular dysplasia left dominant form,Familial isolated arrhythmogenic ventricular dysplasia right dominant form,ARRHYTHMOGENIC RIGHT VENTRICULAR DYSPLASIA FAMILIAL 11	protein_coding
ENSG00000033050	1008.98	669.57	0.591	0	0	ABCF2	ATP binding cassette subfamily F member 2 [Source:HGNC Symbol;Acc:HGNC:71]		protein_coding
ENSG00000282988	591.2	340.7	0.793	0	0	AL031777.3			protein_coding
ENSG00000092036	497.45	274.61	0.855	0	0	HAUS4	HAUS augmin like complex subunit 4 [Source:HGNC Symbol;Acc:HGNC:20163]		protein_coding
ENSG00000233822	904.41	590.44	0.614	0	0	HIST1H2BN	histone cluster 1 H2B family member n [Source:HGNC Symbol;Acc:HGNC:4749]		protein_coding
ENSG00000262814	831.64	536.89	0.63	0	0	MRPL12	mitochondrial ribosomal protein L12 [Source:HGNC Symbol;Acc:HGNC:10378]		protein_coding
ENSG00000078114	540.99	833.85	-0.623	0	0	NEBL	nebulette [Source:HGNC Symbol;Acc:HGNC:16932]	Familial isolated dilated cardiomyopathy	protein_coding
ENSG00000269891	22.76	98.64	-2.068	0	0	ARHGAP19-SLIT1	ARHGAP19-SLIT1 readthrough (NMD candidate) [Source:HGNC Symbol;Acc:HGNC:48348]		protein_coding
ENSG00000168453	401.29	648.79	-0.692	0	0	HR	HR, lysine demethylase and nuclear receptor corepressor [Source:HGNC Symbol;Acc:HGNC:5172]	Alopecia universalis,ATRICHIA WITH PAPULAR LESIONS,Marie Unna hereditary hypotrichosis,ALOPECIA UNIVERSALIS CONGENITA,HYPOTRICHOSIS 4	protein_coding
ENSG00000267469	101.41	233.99	-1.198	0	0	AC005944.1			antisense
ENSG00000276368	426.29	236.28	0.849	0	0	HIST1H2AJ	histone cluster 1 H2A family member j [Source:HGNC Symbol;Acc:HGNC:4727]		protein_coding
ENSG00000235174	469.37	721.61	-0.619	0	0	RPL39P3	ribosomal protein L39 pseudogene 3 [Source:HGNC Symbol;Acc:HGNC:21383]		processed_pseudogene
ENSG00000277157	648.81	416.39	0.639	0	0	HIST1H4D	histone cluster 1 H4 family member d [Source:HGNC Symbol;Acc:HGNC:4782]		protein_coding
ENSG00000114796	405.98	635.88	-0.646	0	0	KLHL24	kelch like family member 24 [Source:HGNC Symbol;Acc:HGNC:25947]	EPIDERMOLYSIS BULLOSA SIMPLEX GENERALIZED WITH SCARRING AND HAIRLOSS	protein_coding
ENSG00000276027	54.13	146.81	-1.423	0	3e-09	RNU12	RNA, U12 small nuclear [Source:HGNC Symbol;Acc:HGNC:19380]		snRNA
ENSG00000277194	160.85	307.46	-0.93	0	1e-09	SNORD22	small nucleolar RNA, C/D box 22 [Source:HGNC Symbol;Acc:HGNC:10145]		snoRNA
ENSG00000276161	463.9	696.13	-0.585	0	1e-09	SNORA17B	small nucleolar RNA, H/ACA box 17B [Source:HGNC Symbol;Acc:HGNC:32636]		snoRNA
ENSG00000248710	86.71	197.56	-1.179	0	4e-09	AC079594.2			protein_coding
ENSG00000146278	313.16	504.61	-0.687	0	2e-09	PNRC1	proline rich nuclear receptor coactivator 1 [Source:HGNC Symbol;Acc:HGNC:17278]		protein_coding
ENSG00000255073	23.78	87.94	-1.844	1e-09	6.4e-08	ZFP91-CNTF	ZFP91-CNTF readthrough (NMD candidate) [Source:HGNC Symbol;Acc:HGNC:33441]		protein_coding
ENSG00000197153	451.36	274.07	0.718	0	4e-09	HIST1H3J	histone cluster 1 H3 family member j [Source:HGNC Symbol;Acc:HGNC:4774]		protein_coding
ENSG00000208772	191.27	340	-0.827	0	8e-09	SNORD94	small nucleolar RNA, C/D box 94 [Source:HGNC Symbol;Acc:HGNC:32756]		snoRNA
ENSG00000105409	242.95	124.04	0.964	1e-09	3.9e-08	ATP1A3	ATPase Na+/K+ transporting subunit alpha 3 [Source:HGNC Symbol;Acc:HGNC:801]	ALTERNATING HEMIPLEGIA OF CHILDHOOD,Rapid-Onset Dystonia-Parkinsonism,Cerebellar ataxia-areflexia-pes cavus-optic atrophy-sensorineural hearing loss syndrome,ALTERNATING HEMIPLEGIA OF CHILDHOOD 2,CEREBELLAR ATAXIA AREFLEXIA PES CAVUS OPTIC ATROPHY AND SENSORINEURAL HEARING LOSS,DYSTONIA 12	protein_coding
ENSG00000180747	209.35	358.67	-0.774	0	2.5e-08	SMG1P3	SMG1 pseudogene 3 [Source:HGNC Symbol;Acc:HGNC:49860]		transcribed_unprocessed_pseudogene
ENSG00000197766	338.47	195.82	0.786	1e-09	6e-08	CFD	complement factor D [Source:HGNC Symbol;Acc:HGNC:2771]	Recurrent Neisseria infections due to factor D deficiency,COMPLEMENT FACTOR D DEFICIENCY	protein_coding
ENSG00000213380	192.45	91.35	1.067	2e-09	1.27e-07	COG8	component of oligomeric golgi complex 8 [Source:HGNC Symbol;Acc:HGNC:18623]	COG8-CDG	protein_coding
ENSG00000059804	184.71	321.71	-0.797	1e-09	8.7e-08	SLC2A3	solute carrier family 2 member 3 [Source:HGNC Symbol;Acc:HGNC:11007]	HUNTINGTON DISEASE	protein_coding
ENSG00000215252	204.29	346.4	-0.759	1e-09	1.03e-07	GOLGA8B	golgin A8 family member B [Source:HGNC Symbol;Acc:HGNC:31973]		protein_coding
ENSG00000264940	331.55	193.45	0.774	1e-09	9.6e-08	SNORD3C	small nucleolar RNA, C/D box 3C [Source:HGNC Symbol;Acc:HGNC:33191]		snoRNA
ENSG00000007080	432.23	273.29	0.659	2e-09	1.5e-07	CCDC124	coiled-coil domain containing 124 [Source:HGNC Symbol;Acc:HGNC:25171]		protein_coding
ENSG00000100116	498.8	327.09	0.607	2e-09	1.53e-07	GCAT	glycine C-acetyltransferase [Source:HGNC Symbol;Acc:HGNC:4188]		protein_coding
ENSG00000085840	480.05	315.25	0.605	5e-09	3.25e-07	ORC1	origin recognition complex subunit 1 [Source:HGNC Symbol;Acc:HGNC:8487]	Meier-Gorlin syndrome 1,Ear-patella-short stature syndrome	protein_coding
ENSG00000131368	416.16	264.05	0.654	6e-09	3.66e-07	MRPS25	mitochondrial ribosomal protein S25 [Source:HGNC Symbol;Acc:HGNC:14511]		protein_coding
ENSG00000169035	375.04	232.4	0.688	7e-09	4.19e-07	KLK7	kallikrein related peptidase 7 [Source:HGNC Symbol;Acc:HGNC:6368]		protein_coding
ENSG00000182621	257.84	405.63	-0.652	1e-08	5.84e-07	PLCB1	phospholipase C beta 1 [Source:HGNC Symbol;Acc:HGNC:15917]	Epileptic Encephalopathy Early Infantile 12,Malignant migrating partial seizures of infancy,West syndrome	protein_coding
ENSG00000008086	60.94	139.87	-1.185	2.5e-08	1.32e-06	CDKL5	cyclin dependent kinase like 5 [Source:HGNC Symbol;Acc:HGNC:11411]	EPILEPTIC ENCEPHALOPATHY EARLY INFANTILE TYPE 2,Atypical Rett syndrome,Early infantile epileptic encephalopathy,West syndrome,EPILEPTIC ENCEPHALOPATHY EARLY INFANTILE 2	protein_coding
ENSG00000172915	98.45	194.74	-0.977	1.5e-08	8.37e-07	NBEA	neurobeachin [Source:HGNC Symbol;Acc:HGNC:7648]		protein_coding
ENSG00000122965	435.04	282.97	0.619	1.6e-08	8.47e-07	RBM19	RNA binding motif protein 19 [Source:HGNC Symbol;Acc:HGNC:29098]		protein_coding
ENSG00000172780	45.65	114.62	-1.309	5.3e-08	2.61e-06	RAB43	RAB43, member RAS oncogene family [Source:HGNC Symbol;Acc:HGNC:19983]		protein_coding
ENSG00000268439	258.66	145.88	0.822	2.1e-08	1.137e-06	EMG1	EMG1, N1-specific pseudouridine methyltransferase [Source:HGNC Symbol;Acc:HGNC:16912]	BOWEN-CONRADI SYNDROME
ENSG00000134013	286.87	437.83	-0.608	2.3e-08	1.201e-06	LOXL2	lysyl oxidase like 2 [Source:HGNC Symbol;Acc:HGNC:6666]		protein_coding
ENSG00000250920	246.59	387.34	-0.649	3e-08	1.539e-06	AC105460.1			lincRNA
ENSG00000143457	189.39	314.17	-0.727	2.8e-08	1.43e-06	GOLPH3L	golgi phosphoprotein 3 like [Source:HGNC Symbol;Acc:HGNC:24882]		protein_coding
ENSG00000163346	233.46	370.12	-0.663	2.7e-08	1.393e-06	PBXIP1	PBX homeobox interacting protein 1 [Source:HGNC Symbol;Acc:HGNC:21199]		protein_coding
ENSG00000116649	359.1	224.87	0.673	3.3e-08	1.664e-06	SRM	spermidine synthase [Source:HGNC Symbol;Acc:HGNC:11296]		protein_coding
ENSG00000137843	210.96	112.94	0.896	5.7e-08	2.758e-06	PAK6	p21 (RAC1) activated kinase 6 [Source:HGNC Symbol;Acc:HGNC:16061]		protein_coding
ENSG00000141965	117.72	49.01	1.247	9.5e-08	4.412e-06	FEM1A	fem-1 homolog A [Source:HGNC Symbol;Acc:HGNC:16934]		protein_coding
ENSG00000197409	315.69	192.75	0.709	5.5e-08	2.719e-06	HIST1H3D	histone cluster 1 H3 family member d [Source:HGNC Symbol;Acc:HGNC:4767]		protein_coding
ENSG00000184270	433.17	286.2	0.596	4.7e-08	2.338e-06	HIST2H2AB	histone cluster 2 H2A family member b [Source:HGNC Symbol;Acc:HGNC:20508]		protein_coding
ENSG00000128510	215.65	117.28	0.873	6.3e-08	3.042e-06	CPA4	carboxypeptidase A4 [Source:HGNC Symbol;Acc:HGNC:15740]		protein_coding
ENSG00000169972	309.22	188.29	0.713	6.4e-08	3.044e-06	PUSL1	pseudouridylate synthase like 1 [Source:HGNC Symbol;Acc:HGNC:26914]		protein_coding
ENSG00000188290	200.64	106.52	0.907	9.3e-08	4.372e-06	HES4	hes family bHLH transcription factor 4 [Source:HGNC Symbol;Acc:HGNC:24149]		protein_coding
ENSG00000115414	283.15	427.15	-0.591	7.3e-08	3.459e-06	FN1	fibronectin 1 [Source:HGNC Symbol;Acc:HGNC:3778]	Spondylometaphyseal Dysplasia with Corner Fractures,Fibronectin glomerulopathy,Spondylometaphyseal dysplasia ^corner fracture^ type,GLOMERULOPATHY WITH FIBRONECTIN DEPOSITS 2,PLASMA FIBRONECTIN DEFICIENCY	protein_coding
ENSG00000178449	241.9	137.72	0.808	1.06e-07	4.909e-06	COX14	COX14, cytochrome c oxidase assembly factor [Source:HGNC Symbol;Acc:HGNC:28216]	MITOCHONDRIAL COMPLEX IV DEFICIENCY,Isolated cytochrome C oxidase deficiency	protein_coding
ENSG00000129451	163.14	80.7	1.007	1.67e-07	7.331e-06	KLK10	kallikrein related peptidase 10 [Source:HGNC Symbol;Acc:HGNC:6358]		protein_coding
ENSG00000174501	138.8	242.61	-0.801	1.15e-07	5.238e-06	ANKRD36C	ankyrin repeat domain 36C [Source:HGNC Symbol;Acc:HGNC:32946]		protein_coding
ENSG00000254996	147.03	69.96	1.061	1.86e-07	8.044e-06	ANKHD1-EIF4EBP3	ANKHD1-EIF4EBP3 readthrough [Source:HGNC Symbol;Acc:HGNC:33530]		protein_coding
ENSG00000283321	132.28	60.48	1.116	2.18e-07	9.28e-06	AC019117.3			protein_coding
ENSG00000137440	191.27	308.79	-0.688	1.47e-07	6.557e-06	FGFBP1	fibroblast growth factor binding protein 1 [Source:HGNC Symbol;Acc:HGNC:19695]		protein_coding
ENSG00000114779	358.16	231.33	0.628	1.88e-07	8.082e-06	ABHD14B	abhydrolase domain containing 14B [Source:HGNC Symbol;Acc:HGNC:28235]		protein_coding
ENSG00000112559	230.65	132.34	0.797	2.28e-07	9.596e-06	MDFI	MyoD family inhibitor [Source:HGNC Symbol;Acc:HGNC:6967]		protein_coding
ENSG00000083807	127.54	58.47	1.112	3.09e-07	1.2447e-05	SLC27A5	solute carrier family 27 member 5 [Source:HGNC Symbol;Acc:HGNC:10999]	Bile acid CoA ligase deficiency and defective amidation	protein_coding
ENSG00000167695	277.53	168.92	0.713	2.86e-07	1.1731e-05	FAM57A	family with sequence similarity 57 member A [Source:HGNC Symbol;Acc:HGNC:29646]		protein_coding
ENSG00000125454	235.01	136.56	0.779	4.25e-07	1.6552e-05	SLC25A19	solute carrier family 25 member 19 [Source:HGNC Symbol;Acc:HGNC:14409]	Amish lethal microcephaly,Progressive polyneuropathy with bilateral striatal necrosis,MICROCEPHALY AMISH TYPE,THIAMINE METABOLISM DYSFUNCTION SYNDROME 4 (BILATERAL STRIATAL DEGENERATION AND PROGRESSIVE POLYNEUROPATHY TYPE)	protein_coding
ENSG00000259976	119.75	212.57	-0.823	3.91e-07	1.5371e-05	AC093010.3			3prime_overlapping_ncRNA
ENSG00000238622	67.45	139.82	-1.041	4.3e-07	1.6721e-05	SNORD97	small nucleolar RNA, C/D box 97 [Source:HGNC Symbol;Acc:HGNC:32760]		snoRNA
ENSG00000132434	223.15	128.04	0.797	4.49e-07	1.7333e-05	LANCL2	LanC like 2 [Source:HGNC Symbol;Acc:HGNC:6509]		protein_coding
ENSG00000137821	85.32	32.28	1.375	1.013e-06	3.6451e-05	LRRC49	leucine rich repeat containing 49 [Source:HGNC Symbol;Acc:HGNC:25965]		protein_coding
ENSG00000006459	240.96	365.82	-0.6	4.41e-07	1.7102e-05	KDM7A	lysine demethylase 7A [Source:HGNC Symbol;Acc:HGNC:22224]		protein_coding
ENSG00000006015	343.16	222.72	0.621	5.17e-07	1.9825e-05	REX1BD	required for excision 1-B domain containing [Source:HGNC Symbol;Acc:HGNC:26098]		protein_coding
ENSG00000262001	48.75	110.82	-1.168	1.052e-06	3.7654e-05	DLGAP1-AS2	DLGAP1 antisense RNA 2 [Source:HGNC Symbol;Acc:HGNC:28146]		antisense
ENSG00000142684	337.28	218.29	0.625	4.97e-07	1.9115e-05	ZNF593	zinc finger protein 593 [Source:HGNC Symbol;Acc:HGNC:30943]		protein_coding
ENSG00000259075	83.2	31.55	1.371	2.159e-06	7.1765e-05	POC1B-GALNT4	POC1B-GALNT4 readthrough [Source:HGNC Symbol;Acc:HGNC:42957]		protein_coding
ENSG00000170222	34.69	88.23	-1.322	1.935e-06	6.5311e-05	ADPRM	ADP-ribose/CDP-alcohol diphosphatase, manganese dependent [Source:HGNC Symbol;Acc:HGNC:30925]		protein_coding
ENSG00000275221	204.76	116.45	0.809	7.73e-07	2.8826e-05	HIST1H2AK	histone cluster 1 H2A family member k [Source:HGNC Symbol;Acc:HGNC:4726]		protein_coding
ENSG00000133265	359.1	237.78	0.593	8.33e-07	3.0786e-05	HSPBP1	HSPA (Hsp70) binding protein 1 [Source:HGNC Symbol;Acc:HGNC:24989]		protein_coding
ENSG00000168061	282.22	176.45	0.675	8.33e-07	3.0786e-05	SAC3D1	SAC3 domain containing 1 [Source:HGNC Symbol;Acc:HGNC:30179]		protein_coding
ENSG00000174428	89.7	168.15	-0.899	1.372e-06	4.7938e-05	GTF2IRD2B	GTF2I repeat domain containing 2B [Source:HGNC Symbol;Acc:HGNC:33125]		protein_coding
ENSG00000103489	115.32	202.28	-0.805	1.177e-06	4.1855e-05	XYLT1	xylosyltransferase 1 [Source:HGNC Symbol;Acc:HGNC:15516]	DESBUQUOIS DYSPLASIA 2,Desbuquois syndrome,XYLT1-CDG,Pseudoxanthoma elasticum	protein_coding
ENSG00000142396	281.42	176.98	0.666	1.347e-06	4.713e-05	ERVK3-1	endogenous retrovirus group K3 member 1 [Source:HGNC Symbol;Acc:HGNC:30466]		protein_coding
ENSG00000197635	100.32	180.76	-0.843	1.554e-06	5.3658e-05	DPP4	dipeptidyl peptidase 4 [Source:HGNC Symbol;Acc:HGNC:3009]		protein_coding
ENSG00000164053	260.59	161.89	0.683	1.704e-06	5.8156e-05	ATRIP	ATR interacting protein [Source:HGNC Symbol;Acc:HGNC:33499]	Seckel syndrome	protein_coding
ENSG00000095539	88.7	164.34	-0.882	2.799e-06	8.9543e-05	SEMA4G	semaphorin 4G [Source:HGNC Symbol;Acc:HGNC:10735]		protein_coding
ENSG00000238105	59.32	122.66	-1.036	2.4e-06	7.8351e-05	GOLGA2P5	GOLGA2 pseudogene 5 [Source:HGNC Symbol;Acc:HGNC:25315]		transcribed_unprocessed_pseudogene
ENSG00000103034	113.45	196.9	-0.79	2.119e-06	7.0622e-05	NDRG4	NDRG family member 4 [Source:HGNC Symbol;Acc:HGNC:14466]		protein_coding
ENSG00000010438	296.28	191.52	0.627	2.877e-06	9.1776e-05	PRSS3	serine protease 3 [Source:HGNC Symbol;Acc:HGNC:9486]		protein_coding
ENSG00000158006	249.4	154.94	0.683	3.371e-06	0.000105839	PAFAH2	platelet activating factor acetylhydrolase 2 [Source:HGNC Symbol;Acc:HGNC:8579]		protein_coding
ENSG00000164638	179.08	279.74	-0.641	2.792e-06	8.9423e-05	SLC29A4	solute carrier family 29 member 4 [Source:HGNC Symbol;Acc:HGNC:23097]		protein_coding
ENSG00000188488	87.2	160.31	-0.871	3.966e-06	0.000122024	SERPINA5	serpin family A member 5 [Source:HGNC Symbol;Acc:HGNC:8723]		protein_coding
ENSG00000150977	129.39	216.26	-0.737	3.263e-06	0.000103008	RILPL2	Rab interacting lysosomal protein like 2 [Source:HGNC Symbol;Acc:HGNC:28787]		protein_coding
ENSG00000251349	55.06	115.01	-1.049	4.87e-06	0.000144982	MSANTD3-TMEFF1	MSANTD3-TMEFF1 readthrough [Source:HGNC Symbol;Acc:HGNC:38838]		protein_coding
ENSG00000138764	187.52	289.43	-0.623	4.328e-06	0.000131573	CCNG2	cyclin G2 [Source:HGNC Symbol;Acc:HGNC:1593]		protein_coding
ENSG00000145358	143.45	233.48	-0.699	4.013e-06	0.000123092	DDIT4L	DNA damage inducible transcript 4 like [Source:HGNC Symbol;Acc:HGNC:30555]		protein_coding
ENSG00000114270	56.26	116.2	-1.033	5.558e-06	0.000162329	COL7A1	collagen type VII alpha 1 chain [Source:HGNC Symbol;Acc:HGNC:2214]	Acral dystrophic epidermolysis bullosa,Centripetalis recessive dystrophic epidermolysis bullosa,Dominant dystrophic epidermolysis bullosa nails only,Dystrophic epidermolysis bullosa pruriginosa,Epidermolysis bullosa simplex superficialis,Generalized dominant dystrophic epidermolysis bullosa,Pretibial dystrophic epidermolysis bullosa,Recessive dystrophic epidermolysis bullosa inversa,Recessive dys…	protein_coding
ENSG00000164897	270.96	173.23	0.642	3.815e-06	0.000117923	TMUB1	transmembrane and ubiquitin like domain containing 1 [Source:HGNC Symbol;Acc:HGNC:21709]		protein_coding
ENSG00000113916	146.26	236.71	-0.691	3.849e-06	0.000118806	BCL6	B cell CLL/lymphoma 6 [Source:HGNC Symbol;Acc:HGNC:1001]	Follicular lymphoma,High grade B-cell lymphoma with MYC and/ or BCL2 and/or BCL6 rearrangement,Intravascular large B-cell lymphoma,Primary mediastinal large B-cell lymphoma	protein_coding
ENSG00000232024	116.51	56.81	1.023	6.323e-06	0.000182501	LSM12P1	LSM12 pseudogene 1 [Source:HGNC Symbol;Acc:HGNC:32453]		processed_pseudogene
ENSG00000100294	285.03	185.06	0.62	4.585e-06	0.00013781	MCAT	malonyl-CoA-acyl carrier protein transacylase [Source:HGNC Symbol;Acc:HGNC:29622]		protein_coding
ENSG00000185973	51.75	108.71	-1.056	8.288e-06	0.000230771	TMLHE	trimethyllysine hydroxylase, epsilon [Source:HGNC Symbol;Acc:HGNC:18308]	AUTISM SUSCEPTIBILITY TO X-LINKED 6	protein_coding
ENSG00000164463	130.33	215.19	-0.719	5.515e-06	0.000161293	CREBRF	CREB3 regulatory factor [Source:HGNC Symbol;Acc:HGNC:24050]		protein_coding
ENSG00000175315	278.46	180.76	0.621	6.901e-06	0.000196051	CST6	cystatin E/M [Source:HGNC Symbol;Acc:HGNC:2478]		protein_coding
ENSG00000186417	30.94	76.39	-1.277	1.6028e-05	0.000405162	GLDN	gliomedin [Source:HGNC Symbol;Acc:HGNC:29514]	Lethal arthroogryposis,LETHAL CONGENITAL CONTRACTURE SYNDROME 11	protein_coding
ENSG00000285000	110.44	187.91	-0.761	7.302e-06	0.000206222	AC008581.2			protein_coding
ENSG00000160570	244.71	154.94	0.656	7.903e-06	0.000220835	DEDD2	death effector domain containing 2 [Source:HGNC Symbol;Acc:HGNC:24450]		protein_coding
ENSG00000167964	192.21	114.05	0.748	9.672e-06	0.000264687	RAB26	RAB26, member RAS oncogene family [Source:HGNC Symbol;Acc:HGNC:14259]		protein_coding
ENSG00000242259	160.81	251.76	-0.643	8.766e-06	0.000242945	C22orf39	chromosome 22 open reading frame 39 [Source:HGNC Symbol;Acc:HGNC:27012]		protein_coding
ENSG00000138623	273.78	178.61	0.613	9.344e-06	0.000257179	SEMA7A	semaphorin 7A (John Milton Hagen blood group) [Source:HGNC Symbol;Acc:HGNC:10741]	BLOOD GROUP JOHN MILTON HAGEN SYSTEM	protein_coding
ENSG00000128228	234.4	147.4	0.666	9.688e-06	0.000264808	SDF2L1	stromal cell derived factor 2 like 1 [Source:HGNC Symbol;Acc:HGNC:10676]		protein_coding
ENSG00000205560	87.88	157.09	-0.831	1.2336e-05	0.000326361	CPT1B	carnitine palmitoyltransferase 1B [Source:HGNC Symbol;Acc:HGNC:2329]		protein_coding
ENSG00000279117	110.64	187.21	-0.753	1.2603e-05	0.000332672	AP001972.5			TEC
ENSG00000148291	214.71	132.34	0.694	9.786e-06	0.000266875	SURF2	surfeit 2 [Source:HGNC Symbol;Acc:HGNC:11475]		protein_coding
ENSG00000167985	218.04	135.53	0.682	1.5375e-05	0.000391723	SDHAF2	succinate dehydrogenase complex assembly factor 2 [Source:HGNC Symbol;Acc:HGNC:26034]	Hereditary pheochromocytoma-paraganglioma,PARAGANGLIOMAS 2	protein_coding
ENSG00000051180	145.33	79.97	0.854	1.7493e-05	0.000437626	RAD51	RAD51 recombinase [Source:HGNC Symbol;Acc:HGNC:9817]	MIRROR MOVEMENTS 2,Familial congenital mirror movements,Fanconi anemia,Hereditary breast and ovarian cancer syndrome,Breast Cancer,FANCONI ANEMIA COMPLEMENTATION GROUP R	protein_coding
ENSG00000100290	195.96	118.35	0.723	1.2627e-05	0.000332885	BIK	BCL2 interacting killer [Source:HGNC Symbol;Acc:HGNC:1051]		protein_coding
ENSG00000151150	177.07	270.06	-0.606	1.2639e-05	0.000332885	ANK3	ankyrin 3 [Source:HGNC Symbol;Acc:HGNC:494]	Intellectual disability-hypotonia-spasticity-sleep disorder syndrome,MENTAL RETARDATION AUTOSOMAL RECESSIVE 37	protein_coding
ENSG00000172159	30	73.16	-1.258	2.7175e-05	0.000636766	FRMD3	FERM domain containing 3 [Source:HGNC Symbol;Acc:HGNC:24125]		protein_coding
ENSG00000171017	267.68	175.65	0.605	1.4693e-05	0.000379459	LRRC8E	leucine rich repeat containing 8 VRAC subunit E [Source:HGNC Symbol;Acc:HGNC:26272]		protein_coding
ENSG00000260075	100.19	48.02	1.046	2.3049e-05	0.000553907	NSFP1	N-ethylmaleimide-sensitive factor pseudogene 1 [Source:HGNC Symbol;Acc:HGNC:31405]		unprocessed_pseudogene
ENSG00000224287	80.76	145.85	-0.845	1.9094e-05	0.000472668	MSL3P1	MSL complex subunit 3 pseudogene 1 [Source:HGNC Symbol;Acc:HGNC:17837]		transcribed_processed_pseudogene
ENSG00000165272	84.38	150.63	-0.829	1.4712e-05	0.00037954	AQP3	aquaporin 3 (Gill blood group) [Source:HGNC Symbol;Acc:HGNC:636]	GIL BLOOD GROUP	protein_coding
ENSG00000197905	224.08	140.95	0.665	1.6362e-05	0.000411869	TEAD4	TEA domain transcription factor 4 [Source:HGNC Symbol;Acc:HGNC:11717]		protein_coding
ENSG00000007237	133.14	214.11	-0.681	1.6105e-05	0.000406684	GAS7	growth arrest specific 7 [Source:HGNC Symbol;Acc:HGNC:4169]		protein_coding
ENSG00000177602	233.46	148.48	0.649	1.5584e-05	0.000396028	HASPIN	histone H3 associated protein kinase [Source:HGNC Symbol;Acc:HGNC:19682]		protein_coding
ENSG00000197837	234.4	149.56	0.645	2.1239e-05	0.000517167	HIST4H4	histone cluster 4 H4 [Source:HGNC Symbol;Acc:HGNC:20510]		protein_coding
ENSG00000266086	34.03	78.86	-1.189	2.773e-05	0.000644949	AC015813.2			protein_coding
ENSG00000100167	138.76	219.49	-0.658	2.7703e-05	0.000644948	SEPT3	septin 3 [Source:HGNC Symbol;Acc:HGNC:10750]		protein_coding
ENSG00000205534	180.41	108.21	0.732	2.6204e-05	0.000618499	SMG1P2	SMG1 pseudogene 2 [Source:HGNC Symbol;Acc:HGNC:49859]		unprocessed_pseudogene
ENSG00000167136	129.41	69.79	0.881	3.4762e-05	0.0007848	ENDOG	endonuclease G [Source:HGNC Symbol;Acc:HGNC:3346]		protein_coding
ENSG00000248383	31.51	74.16	-1.209	5.5418e-05	0.00117029	PCDHAC1	protocadherin alpha subfamily C, 1 [Source:HGNC Symbol;Acc:HGNC:8676]		protein_coding
ENSG00000138111	247.52	161.39	0.614	1.9767e-05	0.000486787	MFSD13A	major facilitator superfamily domain containing 13A [Source:HGNC Symbol;Acc:HGNC:26196]		protein_coding
ENSG00000213337	149.79	85.06	0.809	2.6701e-05	0.0006283	ANKRD39	ankyrin repeat domain 39 [Source:HGNC Symbol;Acc:HGNC:28640]		protein_coding
ENSG00000169429	75.01	32.28	1.192	3.9186e-05	0.000871467	CXCL8	C-X-C motif chemokine ligand 8 [Source:HGNC Symbol;Acc:HGNC:6025]		protein_coding
ENSG00000185551	171.58	102.21	0.742	2.793e-05	0.000648337	NR2F2	nuclear receptor subfamily 2 group F member 2 [Source:HGNC Symbol;Acc:HGNC:7976]	Congenital heart defects multiple types 4,Complete atrioventricular canal-left heart obstruction syndrome,Complete atrioventricular canal-tetralogy of Fallot syndrome,Complete atrioventricular canal-ventricle hypoplasia syndrome,Partial atrioventricular canal	protein_coding
ENSG00000283782	113.52	186.08	-0.708	3.8287e-05	0.000853065	AC116366.3			protein_coding
ENSG00000174136	172.18	102.86	0.738	3.7776e-05	0.000843261	RGMB	repulsive guidance molecule BMP co-receptor b [Source:HGNC Symbol;Acc:HGNC:26896]		protein_coding
ENSG00000196159	102.2	171.07	-0.738	3.5332e-05	0.000795412	FAT4	FAT atypical cadherin 4 [Source:HGNC Symbol;Acc:HGNC:23109]	periventricular neuronal heterotopia,Cerebro-facio-articular syndrome,Hennekam syndrome,HENNEKAM LYMPHANGIECTASIA-LYMPHEDEMA SYNDROME 2,Van Maldergem syndrome 2	protein_coding
ENSG00000132773	153.77	89.37	0.776	3.6509e-05	0.000817281	TOE1	target of EGR1, exonuclease [Source:HGNC Symbol;Acc:HGNC:15954]	Pontocerebellar hypoplasia,Pontocerebellar hypoplasia type 7,PONTOCEREBELLAR HYPOPLASIA TYPE 7	protein_coding
ENSG00000188807	215.65	137.72	0.643	3.9915e-05	0.000884384	TMEM201	transmembrane protein 201 [Source:HGNC Symbol;Acc:HGNC:33719]		protein_coding
ENSG00000208892	69.38	126.96	-0.862	4.1446e-05	0.000910767	SNORA49	small nucleolar RNA, H/ACA box 49 [Source:HGNC Symbol;Acc:HGNC:32642]		snoRNA
ENSG00000165029	44.07	91.45	-1.037	6.4281e-05	0.00132808	ABCA1	ATP binding cassette subfamily A member 1 [Source:HGNC Symbol;Acc:HGNC:29]	APOLIPOPROTEIN A-I DEFICIENCY,TANGIER DISEASE,HYPERCHOLESTEROLEMIA FAMILIAL,HYPOALPHALIPOPROTEINEMIA PRIMARY	protein_coding
ENSG00000105808	91.28	155.53	-0.762	4.2364e-05	0.000925772	RASA4	RAS p21 protein activator 4 [Source:HGNC Symbol;Acc:HGNC:23181]		protein_coding
ENSG00000104856	147.2	85	0.785	5.6479e-05	0.00118954	RELB	RELB proto-oncogene, NF-kB subunit [Source:HGNC Symbol;Acc:HGNC:9956]	IMMUNODEFICIENCY 53	protein_coding
ENSG00000201512	151.89	232.4	-0.61	5.2314e-05	0.00111264	SNORA71C	small nucleolar RNA, H/ACA box 71C [Source:HGNC Symbol;Acc:HGNC:32656]		snoRNA
ENSG00000164494	144.39	222.72	-0.622	4.3842e-05	0.000954555	PDSS2	decaprenyl diphosphate synthase subunit 2 [Source:HGNC Symbol;Acc:HGNC:23041]	COENZYME Q10 DEFICIENCY PRIMARY 3,Leigh syndrome with nephrotic syndrome	protein_coding
ENSG00000079482	79.7	139.87	-0.804	6.3146e-05	0.00130804	OPHN1	oligophrenin 1 [Source:HGNC Symbol;Acc:HGNC:8148]	MENTAL RETARDATION X-LINKED OPHN1-RELATED,X-linked intellectual disability-cerebellar hypoplasia syndrome,Mental retardation X-linked with cerebellar hypoplasia and distinctive facial appearance	protein_coding
ENSG00000142599	106.89	175.38	-0.709	6.1294e-05	0.00127408	RERE	arginine-glutamic acid dipeptide repeats [Source:HGNC Symbol;Acc:HGNC:9965]	Phenocopy of Proximal 1p36 Deletions,1p36 deletion syndrome,RERE-related neurodevelopmental syndrome,NEURODEVELOPMENTAL DISORDER WITH OR WITHOUT ANOMALIES OF THE BRAIN EYE OR HEART	protein_coding
ENSG00000204389	111.39	58.68	0.913	8.152e-05	0.00163471	HSPA1A	heat shock protein family A (Hsp70) member 1A [Source:HGNC Symbol;Acc:HGNC:5232]		protein_coding
ENSG00000175573	240.96	159.24	0.595	4.8399e-05	0.00103675	C11orf68	chromosome 11 open reading frame 68 [Source:HGNC Symbol;Acc:HGNC:28801]		protein_coding
ENSG00000138792	43.13	89.3	-1.033	7.692e-05	0.00155554	ENPEP	glutamyl aminopeptidase [Source:HGNC Symbol;Acc:HGNC:3355]		protein_coding
ENSG00000196782	44.07	90.38	-1.02	8.745e-05	0.00173469	MAML3	mastermind like transcriptional coactivator 3 [Source:HGNC Symbol;Acc:HGNC:16272]		protein_coding
ENSG00000044459	63.76	117.28	-0.869	9.9947e-05	0.00195015	CNTLN	centlein [Source:HGNC Symbol;Acc:HGNC:23432]		protein_coding
ENSG00000128590	127.1	199.39	-0.646	7.9088e-05	0.00159129	DNAJB9	DnaJ heat shock protein family (Hsp40) member B9 [Source:HGNC Symbol;Acc:HGNC:6968]		protein_coding
ENSG00000187024	92.28	45.88	0.993	0.000111738	0.00213654	PTRH1	peptidyl-tRNA hydrolase 1 homolog [Source:HGNC Symbol;Acc:HGNC:27039]		protein_coding
ENSG00000158050	131.26	74.24	0.814	8.3337e-05	0.00166555	DUSP2	dual specificity phosphatase 2 [Source:HGNC Symbol;Acc:HGNC:3068]		protein_coding
ENSG00000213920	77.4	35.67	1.096	0.000144014	0.00261538	MDP1	magnesium dependent phosphatase 1 [Source:HGNC Symbol;Acc:HGNC:28781]		protein_coding
ENSG00000152782	128.8	201.13	-0.639	8.7533e-05	0.00173488	PANK1	pantothenate kinase 1 [Source:HGNC Symbol;Acc:HGNC:8598]		protein_coding
ENSG00000166262	38.44	81.13	-1.058	0.000100574	0.001956	FAM227B	family with sequence similarity 227 member B [Source:HGNC Symbol;Acc:HGNC:26543]		protein_coding
ENSG00000169330	70.32	124.81	-0.819	9.9931e-05	0.00195015	KIAA1024	KIAA1024 [Source:HGNC Symbol;Acc:HGNC:29172]		protein_coding
ENSG00000128699	147.2	222.72	-0.594	9.1627e-05	0.00180851	ORMDL1	ORMDL sphingolipid biosynthesis regulator 1 [Source:HGNC Symbol;Acc:HGNC:16036]		protein_coding
ENSG00000108370	60.01	110.82	-0.874	0.000118211	0.00224771	RGS9	regulator of G protein signaling 9 [Source:HGNC Symbol;Acc:HGNC:10004]	Bradyopsia,PROLONGED ELECTRORETINAL RESPONSE SUPPRESSION	protein_coding
ENSG00000258644	74.44	130.17	-0.798	0.000107446	0.00206439	SYNJ2BP-COX16	SYNJ2BP-COX16 readthrough [Source:HGNC Symbol;Acc:HGNC:48350]		protein_coding
ENSG00000163297	136.89	209.81	-0.612	0.000105173	0.00202586	ANTXR2	anthrax toxin receptor 2 [Source:HGNC Symbol;Acc:HGNC:21732]	INFANTILE SYSTEMIC HYALINOSIS,JUVENILE HYALINE FIBROMATOSIS,HYALINE FIBROMATOSIS SYNDROME	protein_coding
ENSG00000133740	90.21	150.75	-0.734	0.000102745	0.00199171	E2F5	E2F transcription factor 5 [Source:HGNC Symbol;Acc:HGNC:3119]		protein_coding
ENSG00000149929	143.25	84.45	0.755	0.000109005	0.00209267	HIRIP3	HIRA interacting protein 3 [Source:HGNC Symbol;Acc:HGNC:4917]		protein_coding
ENSG00000124374	137.83	210.88	-0.61	0.00011016	0.00211049	PAIP2B	poly(A) binding protein interacting protein 2B [Source:HGNC Symbol;Acc:HGNC:29200]		protein_coding
ENSG00000103254	168.77	104.37	0.688	0.00010009	0.00195134	FAM173A	family with sequence similarity 173 member A [Source:HGNC Symbol;Acc:HGNC:14152]		protein_coding
ENSG00000281490	50.98	97.94	-0.929	0.000146277	0.00265042	CICP14	capicua transcriptional repressor pseudogene 14 [Source:HGNC Symbol;Acc:HGNC:38542]		processed_pseudogene
ENSG00000213066	200.2	129.51	0.624	0.00013816	0.00252178	FGFR1OP	FGFR1 oncogene partner [Source:HGNC Symbol;Acc:HGNC:17012]		protein_coding
ENSG00000137135	162.44	99.71	0.699	0.000153859	0.00276202	ARHGEF39	Rho guanine nucleotide exchange factor 39 [Source:HGNC Symbol;Acc:HGNC:25909]		protein_coding
ENSG00000223459	154.8	93.83	0.716	0.000133527	0.00245104	TCAF1P1	TRPM8 channel associated factor 1 pseudogene 1 [Source:HGNC Symbol;Acc:HGNC:33604]		unprocessed_pseudogene
ENSG00000254726	90.01	149.56	-0.726	0.000129866	0.00239675	MEX3A	mex-3 RNA binding family member A [Source:HGNC Symbol;Acc:HGNC:33482]		protein_coding
ENSG00000163874	128.45	74.24	0.783	0.000177224	0.00311651	ZC3H12A	zinc finger CCCH-type containing 12A [Source:HGNC Symbol;Acc:HGNC:26259]		protein_coding
ENSG00000172663	87.2	44.11	0.967	0.000215767	0.00370688	TMEM134	transmembrane protein 134 [Source:HGNC Symbol;Acc:HGNC:26142]		protein_coding
ENSG00000234912	130.61	76.25	0.769	0.000160939	0.00287462	SNHG20	small nucleolar RNA host gene 20 [Source:HGNC Symbol;Acc:HGNC:33099]		sense_overlapping
ENSG00000284292	31.86	69.33	-1.098	0.000295951	0.0048538	AC004922.1			protein_coding
ENSG00000146411	71.1	123.71	-0.791	0.000180514	0.0031627	SLC2A12	solute carrier family 2 member 12 [Source:HGNC Symbol;Acc:HGNC:18067]		protein_coding
ENSG00000111700	100.47	161.27	-0.677	0.00019194	0.00333596	SLCO1B3	solute carrier organic anion transporter family member 1B3 [Source:HGNC Symbol;Acc:HGNC:10961]	Rotor syndrome,HYPERBILIRUBINEMIA ROTOR TYPE	protein_coding
ENSG00000099785	197.83	130.19	0.6	0.000205962	0.00355892	MARCH2	membrane associated ring-CH-type finger 2 [Source:HGNC Symbol;Acc:HGNC:28038]		protein_coding
ENSG00000252213	44.07	86.08	-0.95	0.000289537	0.00475842	SNORA74D	small nucleolar RNA, H/ACA box 74D [Source:HGNC Symbol;Acc:HGNC:52219]		snoRNA
ENSG00000204514	97.73	52.87	0.874	0.00031241	0.00507491	ZNF814	zinc finger protein 814 [Source:HGNC Symbol;Acc:HGNC:33258]		protein_coding
ENSG00000250251	143.77	87.9	0.704	0.000286861	0.00473073	PKD1P6	polycystin 1, transient receptor potential channel interacting pseudogene 6 [Source:HGNC Symbol;Acc:HGNC:30070]		transcribed_unprocessed_pseudogene
ENSG00000147180	107.82	168.92	-0.643	0.000296535	0.00486004	ZNF711	zinc finger protein 711 [Source:HGNC Symbol;Acc:HGNC:13128]	MENTAL RETARDATION X-LINKED ZNF711-RELATED,X-linked non-syndromic intellectual disability,MENTAL RETARDATION X-LINKED 97	protein_coding
ENSG00000155324	98.45	157.09	-0.669	0.000265454	0.00441739	GRAMD2B	GRAM domain containing 2B [Source:HGNC Symbol;Acc:HGNC:24911]		protein_coding
ENSG00000103248	181.89	118.35	0.616	0.000262354	0.00437685	MTHFSD	methenyltetrahydrofolate synthetase domain containing [Source:HGNC Symbol;Acc:HGNC:25778]		protein_coding
ENSG00000005189	115.98	66.71	0.789	0.000360426	0.0057339	REXO5	RNA exonuclease 5 [Source:HGNC Symbol;Acc:HGNC:24661]		protein_coding
ENSG00000173137	160.33	101.14	0.659	0.000313349	0.00508324	ADCK5	aarF domain containing kinase 5 [Source:HGNC Symbol;Acc:HGNC:21738]		protein_coding
ENSG00000182771	47.79	90.36	-0.905	0.000440567	0.00679151	GRID1	glutamate ionotropic receptor delta type subunit 1 [Source:HGNC Symbol;Acc:HGNC:4575]		protein_coding
ENSG00000140323	39.53	78.49	-0.972	0.000597861	0.00868865	DISP2	dispatched RND transporter family member 2 [Source:HGNC Symbol;Acc:HGNC:19712]		protein_coding
ENSG00000157107	88.13	143.1	-0.693	0.000359502	0.00572301	FCHO2	FCH domain only 2 [Source:HGNC Symbol;Acc:HGNC:25180]		protein_coding
ENSG00000214756	181.83	119.05	0.607	0.000336469	0.00541049	CSKMT	citrate synthase lysine methyltransferase [Source:HGNC Symbol;Acc:HGNC:33113]		protein_coding
ENSG00000137834	89.07	144.18	-0.689	0.000381539	0.00602161	SMAD6	SMAD family member 6 [Source:HGNC Symbol;Acc:HGNC:6772]	Familial bicuspid aortic valve,AORTIC VALVE DISEASE 2,Craniosynostosis 7	protein_coding
ENSG00000156804	41.25	80.7	-0.951	0.000371376	0.00588847	FBXO32	F-box protein 32 [Source:HGNC Symbol;Acc:HGNC:16731]		protein_coding
ENSG00000182732	46.88	88.23	-0.898	0.000527314	0.00784481	RGS6	regulator of G protein signaling 6 [Source:HGNC Symbol;Acc:HGNC:10002]		protein_coding
ENSG00000244045	180.96	119.03	0.6	0.000410585	0.0063996	TMEM199	transmembrane protein 199 [Source:HGNC Symbol;Acc:HGNC:18085]	Disorder of Golgi homeostasis,TMEM199-CDG,CONGENITAL DISORDER OF GLYCOSYLATION TYPE IIp	protein_coding
ENSG00000169136	88.28	47.21	0.889	0.000527314	0.00784481	ATF5	activating transcription factor 5 [Source:HGNC Symbol;Acc:HGNC:790]		protein_coding
ENSG00000243449	112.51	65.63	0.769	0.000548335	0.0081172	C4orf48	chromosome 4 open reading frame 48 [Source:HGNC Symbol;Acc:HGNC:34437]		protein_coding
ENSG00000014914	68.44	116.2	-0.755	0.000496591	0.00748116	MTMR11	myotubularin related protein 11 [Source:HGNC Symbol;Acc:HGNC:24307]		protein_coding
ENSG00000120093	68.44	116.2	-0.755	0.000496591	0.00748116	HOXB3	homeobox B3 [Source:HGNC Symbol;Acc:HGNC:5114]		protein_coding
ENSG00000144935	50.63	92.53	-0.857	0.000585116	0.00853461	TRPC1	transient receptor potential cation channel subfamily C member 1 [Source:HGNC Symbol;Acc:HGNC:12333]		protein_coding
ENSG00000128000	104.07	161.47	-0.629	0.000556479	0.00819768	ZNF780B	zinc finger protein 780B [Source:HGNC Symbol;Acc:HGNC:33109]		protein_coding
ENSG00000149809	172.52	112.97	0.606	0.000464737	0.00712269	TM7SF2	transmembrane 7 superfamily member 2 [Source:HGNC Symbol;Acc:HGNC:11863]		protein_coding
ENSG00000254505	176.86	116.69	0.596	0.000557065	0.00819768	CHMP4A	charged multivesicular body protein 4A [Source:HGNC Symbol;Acc:HGNC:20274]		protein_coding
ENSG00000129595	33.58	68.49	-1.007	0.000986511	0.0129703	EPB41L4A	erythrocyte membrane protein band 4.1 like 4A [Source:HGNC Symbol;Acc:HGNC:13278]		protein_coding
ENSG00000166046	74.19	123.02	-0.722	0.000591057	0.00860548	TCP11L2	t-complex 11 like 2 [Source:HGNC Symbol;Acc:HGNC:28627]		protein_coding
ENSG00000263585	52.49	94.45	-0.835	0.000639797	0.00920837	AC145207.4			antisense
ENSG00000161980	97.43	54.87	0.817	0.000824649	0.011316	POLR3K	RNA polymerase III subunit K [Source:HGNC Symbol;Acc:HGNC:14121]		protein_coding
ENSG00000108641	126.57	77.18	0.706	0.000568706	0.00832578	B9D1	B9 domain containing 1 [Source:HGNC Symbol;Acc:HGNC:24123]	Meckel syndrome 9,Joubert Syndrome,Meckel syndrome,JOUBERT SYNDROME 27,MECKEL SYNDROME TYPE 9	protein_coding
ENSG00000272752	78.26	127.84	-0.701	0.000605742	0.00879766	STAG3L5P-PVRIG2P-PILRB	STAG3L5P-PVRIG2P-PILRB readthrough [Source:HGNC Symbol;Acc:HGNC:48898]		processed_transcript
ENSG00000116106	76.88	125.88	-0.704	0.000715517	0.0100912	EPHA4	EPH receptor A4 [Source:HGNC Symbol;Acc:HGNC:3388]	Amyotrophic lateral sclerosis	protein_coding
ENSG00000120832	57.19	100.06	-0.796	0.000749851	0.0104703	MTERF2	mitochondrial transcription termination factor 2 [Source:HGNC Symbol;Acc:HGNC:30779]		protein_coding
ENSG00000276386	75.35	39.02	0.932	0.000959168	0.0128228	CNTNAP3P2	contactin associated protein-like 3 pseudogene 2 [Source:HGNC Symbol;Acc:HGNC:49589]		unprocessed_pseudogene
ENSG00000114841	72.19	119.43	-0.718	0.000827566	0.011343	DNAH1	dynein axonemal heavy chain 1 [Source:HGNC Symbol;Acc:HGNC:2940]	Non-syndromic male infertility due to sperm motility disorder,Primary ciliary dyskinesia,CILIARY DYSKINESIA PRIMARY 37,SPERMATOGENIC FAILURE 18	protein_coding
ENSG00000212907	47.82	87.15	-0.852	0.000999449	0.0131043	MT-ND4L	mitochondrially encoded NADH:ubiquinone oxidoreductase core subunit 4L [Source:HGNC Symbol;Acc:HGNC:7460]	Leber hereditary optic neuropathy,LEBER OPTIC ATROPHY	protein_coding
ENSG00000178096	99.38	57.02	0.791	0.000966094	0.0128577	BOLA1	bolA family member 1 [Source:HGNC Symbol;Acc:HGNC:24263]		protein_coding
ENSG00000116574	74.07	121.58	-0.707	0.000745898	0.0104334	RHOU	ras homolog family member U [Source:HGNC Symbol;Acc:HGNC:17794]		protein_coding
ENSG00000117242	80.27	42.81	0.891	0.00108439	0.0140027	PINK1-AS	PINK1 antisense RNA [Source:HGNC Symbol;Acc:HGNC:38872]		antisense
ENSG00000270170	102.2	59.18	0.778	0.000876089	0.0119055	NCBP2-AS2	NCBP2 antisense RNA 2 (head to head) [Source:HGNC Symbol;Acc:HGNC:25121]		protein_coding
ENSG00000188549	75.01	122.66	-0.702	0.000794414	0.0109705	CCDC9B	coiled-coil domain containing 9B [Source:HGNC Symbol;Acc:HGNC:33488]		protein_coding
ENSG00000284491	167.9	111.28	0.589	0.00077084	0.0106883	THSD8	thrombospondin type 1 domain containing 8 [Source:HGNC Symbol;Acc:HGNC:53785]		protein_coding
ENSG00000146410	89.07	49.49	0.835	0.000835975	0.011432	MTFR2	mitochondrial fission regulator 2 [Source:HGNC Symbol;Acc:HGNC:21115]		protein_coding
ENSG00000153234	76.88	124.81	-0.692	0.000897766	0.0121517	NR4A2	nuclear receptor subfamily 4 group A member 2 [Source:HGNC Symbol;Acc:HGNC:7981]	Parkinson disease late-onset	protein_coding
ENSG00000283515	61.24	104.56	-0.762	0.000794028	0.0109705	AC020915.5			protein_coding
ENSG00000132394	45.78	83.92	-0.86	0.00109253	0.0140544	EEFSEC	eukaryotic elongation factor, selenocysteine-tRNA specific [Source:HGNC Symbol;Acc:HGNC:24614]		protein_coding
ENSG00000207496	89.9	141	-0.644	0.000961239	0.0128289	SNORA7A	small nucleolar RNA, H/ACA box 7A [Source:HGNC Symbol;Acc:HGNC:32592]		snoRNA
ENSG00000185710	112.12	67.18	0.73	0.00095285	0.0127526	SMG1P4	SMG1 pseudogene 4 [Source:HGNC Symbol;Acc:HGNC:49861]		transcribed_unprocessed_pseudogene
ENSG00000175155	80.63	129.11	-0.673	0.00113074	0.014437	YPEL2	yippee like 2 [Source:HGNC Symbol;Acc:HGNC:18326]		protein_coding
ENSG00000183597	165.02	109.53	0.587	0.00109097	0.0140493	TANGO2	transport and golgi organization 2 homolog [Source:HGNC Symbol;Acc:HGNC:25439]	Infancy-Onset Recurrent Metabolic Crises with Encephalocardiomyopathy,Recurrent metabolic encephalomyopathic crises-rhabdomyolysis-cardiac arrhythmia-intellectual disability syndrome,METABOLIC ENCEPHALOMYOPATHIC CRISES RECURRENT WITH RHABDOMYOLYSIS CARDIAC ARRHYTHMIAS AND NEURODEGENERATION	protein_coding
ENSG00000106689	69.38	35.51	0.947	0.00165899	0.0196566	LHX2	LIM homeobox 2 [Source:HGNC Symbol;Acc:HGNC:6594]		protein_coding
ENSG00000196544	125.48	77.95	0.68	0.00118983	0.0150946	BORCS6	BLOC-1 related complex subunit 6 [Source:HGNC Symbol;Acc:HGNC:25939]		protein_coding
ENSG00000267322	47.38	85.52	-0.839	0.000913166	0.0123252	SNHG22	small nucleolar RNA host gene 22 [Source:HGNC Symbol;Acc:HGNC:50285]		antisense
ENSG00000244693	90.31	140.93	-0.636	0.000961239	0.0128289	CTAGE8	CTAGE family member 8 [Source:HGNC Symbol;Acc:HGNC:37294]		protein_coding
ENSG00000151176	76.88	123.73	-0.679	0.00112332	0.0143808	PLBD2	phospholipase B domain containing 2 [Source:HGNC Symbol;Acc:HGNC:27283]		protein_coding
ENSG00000226065	69.63	114.22	-0.706	0.00145623	0.0177932	ZBTB45P2	zinc finger and BTB domain containing 45 pseudogene 2 [Source:HGNC Symbol;Acc:HGNC:49228]		processed_pseudogene
ENSG00000185483	71.26	116.2	-0.698	0.0012323	0.0155425	ROR1	receptor tyrosine kinase like orphan receptor 1 [Source:HGNC Symbol;Acc:HGNC:10256]	Autosomal recessive non-syndromic sensorineural deafness type DFNB,DEAFNESS AUTOSOMAL RECESSIVE 108	protein_coding
ENSG00000148950	70.32	36.58	0.924	0.00184008	0.0213361	IMMP1L	inner mitochondrial membrane peptidase subunit 1 [Source:HGNC Symbol;Acc:HGNC:26317]		protein_coding
ENSG00000276077	65.55	108.86	-0.723	0.001428	0.017547	CU633904.1	uncharacterized LOC102724951 [Source:NCBI gene;Acc:102724951]		lincRNA
ENSG00000187630	150.35	98.57	0.604	0.00148108	0.0180413	DHRS4L2	dehydrogenase/reductase 4 like 2 [Source:HGNC Symbol;Acc:HGNC:19731]		protein_coding
ENSG00000182253	100.43	152.5	-0.598	0.00126959	0.0158625	SYNM	synemin [Source:HGNC Symbol;Acc:HGNC:24466]		protein_coding
ENSG00000143333	91.88	52.72	0.79	0.00151186	0.0183227	RGS16	regulator of G protein signaling 16 [Source:HGNC Symbol;Acc:HGNC:9997]		protein_coding
ENSG00000125430	38.44	72.58	-0.9	0.00115099	0.0146642	HS3ST3B1	heparan sulfate-glucosamine 3-sulfotransferase 3B1 [Source:HGNC Symbol;Acc:HGNC:5198]		protein_coding
ENSG00000171791	36.57	69.94	-0.917	0.00184008	0.0213361	BCL2	BCL2, apoptosis regulator [Source:HGNC Symbol;Acc:HGNC:990]	Follicular lymphoma,High grade B-cell lymphoma with MYC and/ or BCL2 and/or BCL6 rearrangement,Intravascular large B-cell lymphoma	protein_coding
ENSG00000228594	68.44	35.51	0.927	0.00220938	0.0244085	FNDC10	fibronectin type III domain containing 10 [Source:HGNC Symbol;Acc:HGNC:42951]		protein_coding
ENSG00000196569	110.64	67.35	0.708	0.00120596	0.0152366	LAMA2	laminin subunit alpha 2 [Source:HGNC Symbol;Acc:HGNC:6482]	Congenital Muscular Dystrophy,Congenital muscular dystrophy type 1A,MUSCULAR DYSTROPHY CONGENITAL MEROSIN-DEFICIENT 1A	protein_coding
ENSG00000184384	67.51	110.82	-0.707	0.00161911	0.0193026	MAML2	mastermind like transcriptional coactivator 2 [Source:HGNC Symbol;Acc:HGNC:16259]		protein_coding
ENSG00000133027	127.51	80.7	0.653	0.00140471	0.0173233	PEMT	phosphatidylethanolamine N-methyltransferase [Source:HGNC Symbol;Acc:HGNC:8830]		protein_coding
ENSG00000262943	87.2	49.49	0.805	0.00141859	0.0174584	ALOX12P2	arachidonate 12-lipoxygenase pseudogene 2 [Source:HGNC Symbol;Acc:HGNC:432]		transcribed_unprocessed_pseudogene
ENSG00000205643	98.45	58.1	0.751	0.0017043	0.0201236	CDPF1	cysteine rich DPF motif domain containing 1 [Source:HGNC Symbol;Acc:HGNC:33710]		protein_coding
ENSG00000182580	62.82	104.37	-0.723	0.00187826	0.0216213	EPHB3	EPH receptor B3 [Source:HGNC Symbol;Acc:HGNC:3394]		protein_coding
ENSG00000104213	67.98	110.82	-0.697	0.00161911	0.0193026	PDGFRL	platelet derived growth factor receptor like [Source:HGNC Symbol;Acc:HGNC:8805]	Adult hepatocellular carcinoma,Hepatocellular Carcinoma	protein_coding
ENSG00000214826	76.6	41.89	0.855	0.00171048	0.02018	DDX12P	DEAD/H-box helicase 12, pseudogene [Source:HGNC Symbol;Acc:HGNC:2737]		unprocessed_pseudogene
ENSG00000023445	145.33	95.76	0.597	0.00192704	0.0220283	BIRC3	baculoviral IAP repeat containing 3 [Source:HGNC Symbol;Acc:HGNC:591]	MALT lymphoma	protein_coding
ENSG00000173480	82.53	128.9	-0.637	0.00192747	0.0220283	ZNF417	zinc finger protein 417 [Source:HGNC Symbol;Acc:HGNC:20646]		protein_coding
ENSG00000276710	78.48	43.45	0.838	0.00187304	0.0216213	CSPG4P10	chondroitin sulfate proteoglycan 4 pseudogene 10 [Source:HGNC Symbol;Acc:HGNC:48361]		transcribed_unprocessed_pseudogene
ENSG00000171843	98.45	148.48	-0.588	0.00172707	0.020332	MLLT3	MLLT3, super elongation complex subunit [Source:HGNC Symbol;Acc:HGNC:7136]	Acute myeloid leukemia with t(9;11)(p22;q23)	protein_coding
ENSG00000165886	142.51	93.61	0.601	0.00176206	0.0206726	UBTD1	ubiquitin domain containing 1 [Source:HGNC Symbol;Acc:HGNC:25683]		protein_coding
ENSG00000024862	108.76	66.71	0.697	0.00191399	0.0219478	CCDC28A	coiled-coil domain containing 28A [Source:HGNC Symbol;Acc:HGNC:21098]		protein_coding
ENSG00000228672	52.51	90.38	-0.772	0.00248671	0.0267299	PROB1	proline rich basic protein 1 [Source:HGNC Symbol;Acc:HGNC:41906]		protein_coding
ENSG00000169891	69.38	111.9	-0.682	0.0017205	0.0202743	REPS2	RALBP1 associated Eps domain containing 2 [Source:HGNC Symbol;Acc:HGNC:9963]		protein_coding
ENSG00000274750	54.38	92.53	-0.756	0.00163125	0.0194051	HIST1H3E	histone cluster 1 H3 family member e [Source:HGNC Symbol;Acc:HGNC:4769]		protein_coding
ENSG00000008517	73.13	39.81	0.861	0.00245575	0.0264567	IL32	interleukin 32 [Source:HGNC Symbol;Acc:HGNC:16830]		protein_coding
ENSG00000142544	78.76	44.11	0.822	0.00204498	0.0229752	CTU1	cytosolic thiouridylase subunit 1 [Source:HGNC Symbol;Acc:HGNC:29590]		protein_coding
ENSG00000261373	119.44	75.67	0.652	0.00254271	0.027213	VPS9D1-AS1	VPS9D1 antisense RNA 1 [Source:HGNC Symbol;Acc:HGNC:48915]		antisense
ENSG00000123384	86.02	132.34	-0.616	0.00223113	0.0246033	LRP1	LDL receptor related protein 1 [Source:HGNC Symbol;Acc:HGNC:6692]	Atrophoderma vermiculata,Keratosis follicularis spinulosa decalvans,KERATOSIS PILARIS ATROPHICANS	protein_coding
ENSG00000148803	95.63	57.02	0.736	0.00202483	0.0228228	FUOM	fucose mutarotase [Source:HGNC Symbol;Acc:HGNC:24733]		protein_coding
ENSG00000170653	77.44	121.6	-0.644	0.00174393	0.0204772	ATF7	activating transcription factor 7 [Source:HGNC Symbol;Acc:HGNC:792]		protein_coding
ENSG00000284976	135.01	88.23	0.608	0.00199937	0.0226011	BX255925.3			protein_coding
ENSG00000143847	50.63	87.15	-0.772	0.00275426	0.0289027	PPFIA4	PTPRF interacting protein alpha 4 [Source:HGNC Symbol;Acc:HGNC:9248]		protein_coding
ENSG00000107614	65.63	106.52	-0.69	0.00226208	0.0248641	TRDMT1	tRNA aspartic acid methyltransferase 1 [Source:HGNC Symbol;Acc:HGNC:2977]		protein_coding
ENSG00000135097	129.39	83.92	0.619	0.00249017	0.026743	MSI1	musashi RNA binding protein 1 [Source:HGNC Symbol;Acc:HGNC:7330]	MSI1-associated Microcephaly	protein_coding
ENSG00000187957	39.38	72.09	-0.856	0.00223829	0.024648	DNER	delta/notch like EGF repeat containing [Source:HGNC Symbol;Acc:HGNC:24456]		protein_coding
ENSG00000128596	59.07	97.91	-0.719	0.00231739	0.0253089	CCDC136	coiled-coil domain containing 136 [Source:HGNC Symbol;Acc:HGNC:22225]		protein_coding
ENSG00000116874	52.51	89.3	-0.755	0.00317177	0.0322496	WARS2	tryptophanyl tRNA synthetase 2, mitochondrial [Source:HGNC Symbol;Acc:HGNC:12730]	Autosomal recessive non-syndromic intellectual disability,NEURODEVELOPMENTAL DISORDER MITOCHONDRIAL WITH ABNORMAL MOVEMENTS AND LACTIC ACIDOSIS WITH OR WITHOUT SEIZURES	protein_coding
ENSG00000165060	111.27	69.82	0.665	0.00284404	0.0296344	FXN	frataxin [Source:HGNC Symbol;Acc:HGNC:3951]	FRIEDREICH ATAXIA,FRIEDREICH ATAXIA 1	protein_coding
ENSG00000005238	92.82	139.87	-0.586	0.00250772	0.026883	FAM214B	family with sequence similarity 214 member B [Source:HGNC Symbol;Acc:HGNC:25666]		protein_coding
ENSG00000070731	45.61	80	-0.797	0.00312553	0.0319693	ST6GALNAC2	ST6 N-acetylgalactosaminide alpha-2,6-sialyltransferase 2 [Source:HGNC Symbol;Acc:HGNC:10867]		protein_coding
ENSG00000169762	62.82	102.21	-0.694	0.00297692	0.0307126	TAPT1	transmembrane anterior posterior transformation 1 [Source:HGNC Symbol;Acc:HGNC:26887]	COMPLEX LETHAL OSTEOCHONDRODYSPLASIA,OSTEOCHONDRODYSPLASIA COMPLEX LETHAL SYMOENS-BARNES-GISTELINCK TYPE	protein_coding
ENSG00000234648	49.24	84.7	-0.77	0.00237175	0.025735	AL162151.2			processed_pseudogene
ENSG00000148408	42.19	75.32	-0.821	0.00292806	0.0303265	CACNA1B	calcium voltage-gated channel subunit alpha1 B [Source:HGNC Symbol;Acc:HGNC:1389]	Dystonia 23	protein_coding
ENSG00000164124	86.26	131.26	-0.6	0.00273411	0.028704	TMEM144	transmembrane protein 144 [Source:HGNC Symbol;Acc:HGNC:25633]		protein_coding
ENSG00000186654	136.94	90.97	0.585	0.00279967	0.0292634	PRR5	proline rich 5 [Source:HGNC Symbol;Acc:HGNC:31682]		protein_coding
ENSG00000007341	55.71	92.61	-0.723	0.00305438	0.0313626	ST7L	suppression of tumorigenicity 7 like [Source:HGNC Symbol;Acc:HGNC:18441]		protein_coding
ENSG00000115274	109.39	68.91	0.659	0.00334959	0.033697	INO80B	INO80 complex subunit B [Source:HGNC Symbol;Acc:HGNC:13324]		protein_coding
ENSG00000155792	77.82	120.51	-0.624	0.00281474	0.0293953	DEPTOR	DEP domain containing MTOR interacting protein [Source:HGNC Symbol;Acc:HGNC:22953]		protein_coding
ENSG00000091844	51.57	87.15	-0.746	0.0037702	0.0368922	RGS17	regulator of G protein signaling 17 [Source:HGNC Symbol;Acc:HGNC:14088]		protein_coding
ENSG00000165449	120.95	78.54	0.617	0.0036348	0.0358863	SLC16A9	solute carrier family 16 member 9 [Source:HGNC Symbol;Acc:HGNC:23520]		protein_coding
ENSG00000175106	59.25	96.67	-0.697	0.00293048	0.0303384	TVP23C	trans-golgi network vesicle protein 23 homolog C [Source:HGNC Symbol;Acc:HGNC:30453]		protein_coding
ENSG00000273033	64.69	103.29	-0.667	0.00417112	0.0397123	LINC02035	long intergenic non-protein coding RNA 2035 [Source:HGNC Symbol;Acc:HGNC:52875]		lincRNA
ENSG00000198840	36.57	66.71	-0.85	0.00423246	0.0400949	MT-ND3	mitochondrially encoded NADH:ubiquinone oxidoreductase core subunit 3 [Source:HGNC Symbol;Acc:HGNC:7458]	Isolated complex I deficiency,Leber plus disease,Maternally-inherited Leigh syndrome	protein_coding
ENSG00000200394	36.57	66.71	-0.85	0.00423246	0.0400949	SNORA38B	small nucleolar RNA, H/ACA box 38B [Source:HGNC Symbol;Acc:HGNC:33617]		snoRNA
ENSG00000217555	115.93	74.86	0.624	0.00368695	0.0363261	CKLF	chemokine like factor [Source:HGNC Symbol;Acc:HGNC:13253]		protein_coding
ENSG00000139410	94.7	58.1	0.695	0.00347214	0.034552	SDSL	serine dehydratase like [Source:HGNC Symbol;Acc:HGNC:30404]		protein_coding
ENSG00000100968	37.5	67.78	-0.837	0.00461844	0.0427004	NFATC4	nuclear factor of activated T cells 4 [Source:HGNC Symbol;Acc:HGNC:7778]		protein_coding
ENSG00000163710	44.07	76.39	-0.78	0.00445492	0.0416403	PCOLCE2	procollagen C-endopeptidase enhancer 2 [Source:HGNC Symbol;Acc:HGNC:8739]		protein_coding
ENSG00000169031	68.44	107.59	-0.645	0.00317185	0.0322496	COL4A3	collagen type IV alpha 3 chain [Source:HGNC Symbol;Acc:HGNC:2204]	Alport syndrome autosomal dominant,ALPORT SYNDROME AUTOSOMAL RECESSIVE,Autosomal dominant Alport syndrome,Autosomal recessive Alport syndrome,Familial idiopathic steroid-resistant nephrotic syndrome with focal segmental hyalinosis,HEMATURIA BENIGN FAMILIAL	protein_coding
ENSG00000163995	51.57	86.08	-0.728	0.00478614	0.0439275	ABLIM2	actin binding LIM protein family member 2 [Source:HGNC Symbol;Acc:HGNC:19195]		protein_coding
ENSG00000225648	110.64	71.01	0.633	0.00372231	0.0365687	SBDSP1	SBDS, ribosome maturation factor pseudogene 1 [Source:HGNC Symbol;Acc:HGNC:21646]		transcribed_unprocessed_pseudogene
ENSG00000198237	48.32	81.75	-0.747	0.00363391	0.0358863	AC131392.1			unprocessed_pseudogene
ENSG00000160767	123.76	81.77	0.592	0.00416996	0.0397123	FAM189B	family with sequence similarity 189 member B [Source:HGNC Symbol;Acc:HGNC:1233]		protein_coding
ENSG00000219410	102.47	64.67	0.656	0.00518471	0.0467915	AC125494.1			bidirectional_promoter_lncRNA
ENSG00000196295	70.32	109.53	-0.632	0.00353307	0.0350414	AC005154.1			processed_transcript
ENSG00000116815	46.88	79.62	-0.752	0.00433071	0.0408215	CD58	CD58 molecule [Source:HGNC Symbol;Acc:HGNC:1688]		protein_coding
ENSG00000260121	64.55	35.67	0.838	0.00507728	0.0460694	AC138028.4			antisense
ENSG00000132563	65.63	36.58	0.826	0.00553579	0.0492913	REEP2	receptor accessory protein 2 [Source:HGNC Symbol;Acc:HGNC:17975]	Autosomal spastic paraplegia type 72,Spastic paraplegia 72 autosomal recessive	protein_coding
ENSG00000113240	100.32	63.48	0.652	0.00465562	0.042961	CLK4	CDC like kinase 4 [Source:HGNC Symbol;Acc:HGNC:13659]		protein_coding
ENSG00000283378	67.08	37.74	0.813	0.00601596	0.0525857	BX088645.1	contactin associated protein-like 3-like [Source:NCBI gene;Acc:100289279]		protein_coding
ENSG00000247134	52.51	86.08	-0.703	0.00643465	0.0553134	AC090204.1			lincRNA
ENSG00000143341	38.44	67.78	-0.802	0.00461844	0.0427004	HMCN1	hemicentin 1 [Source:HGNC Symbol;Acc:HGNC:19194]	MACULAR DEGENERATION AGE-RELATED 1	protein_coding
ENSG00000103876	117.2	77.47	0.591	0.00497892	0.0454	FAH	fumarylacetoacetate hydrolase [Source:HGNC Symbol;Acc:HGNC:3579]	Tyrosinemia type 1,TYROSINEMIA TYPE I	protein_coding
ENSG00000213096	70.25	108.26	-0.617	0.00540085	0.0483846	ZNF254	zinc finger protein 254 [Source:HGNC Symbol;Acc:HGNC:13047]		protein_coding
ENSG00000223478	45.94	77.47	-0.741	0.00659086	0.0562308	AL441992.1			antisense
ENSG00000183840	49.69	82.07	-0.713	0.0067462	0.0571678	GPR39	G protein-coupled receptor 39 [Source:HGNC Symbol;Acc:HGNC:4496]		protein_coding
ENSG00000124444	113.93	75.13	0.594	0.00556593	0.0495411	ZNF576	zinc finger protein 576 [Source:HGNC Symbol;Acc:HGNC:28357]		protein_coding
ENSG00000198890	99.38	63.48	0.639	0.00579243	0.0511014	PRMT6	protein arginine methyltransferase 6 [Source:HGNC Symbol;Acc:HGNC:18241]		protein_coding
ENSG00000029534	57.19	91.45	-0.668	0.00647949	0.0555452	ANK1	ankyrin 1 [Source:HGNC Symbol;Acc:HGNC:492]	8p11.2 deletion syndrome,Hereditary spherocytosis,SPHEROCYTOSIS TYPE 1	protein_coding
ENSG00000130449	67.51	104.37	-0.621	0.00743364	0.0616613	ZSWIM6	zinc finger SWIM-type containing 6 [Source:HGNC Symbol;Acc:HGNC:29316]	Acromelic frontonasal dysostosis,Acromelic frontonasal dysplasia,NEURODEVELOPMENTAL DISORDER WITH MOVEMENT ABNORMALITIES ABNORMALGAIT AND AUTISTIC FEATURES	protein_coding
ENSG00000142920	70.32	40.89	0.768	0.00758466	0.0624113	AZIN2	antizyme inhibitor 2 [Source:HGNC Symbol;Acc:HGNC:29957]		protein_coding
ENSG00000254837	45	75.65	-0.737	0.00615067	0.0535279	AP001372.2	uncharacterized LOC100287896 [Source:NCBI gene;Acc:100287896]		bidirectional_promoter_lncRNA
ENSG00000165113	44.07	74.24	-0.739	0.00732987	0.0610728	GKAP1	G kinase anchoring protein 1 [Source:HGNC Symbol;Acc:HGNC:17496]		protein_coding
ENSG00000221491	45	75.32	-0.73	0.00784643	0.0632565	SNORA2C	small nucleolar RNA, H/ACA box 2C [Source:HGNC Symbol;Acc:HGNC:32624]		snoRNA
ENSG00000267002	38.76	67.13	-0.777	0.00841684	0.0669057	AC060780.1			lincRNA
ENSG00000162650	68.44	39.81	0.767	0.00905782	0.0707286	ATXN7L2	ataxin 7 like 2 [Source:HGNC Symbol;Acc:HGNC:28713]		protein_coding
ENSG00000186529	46.8	77.47	-0.715	0.00893322	0.0701228	CYP4F3	cytochrome P450 family 4 subfamily F member 3 [Source:HGNC Symbol;Acc:HGNC:2646]		protein_coding
ENSG00000164010	40.16	68.86	-0.763	0.00704061	0.0591932	ERMAP	erythroblast membrane associated protein (Scianna blood group) [Source:HGNC Symbol;Acc:HGNC:15743]	BLOOD GROUP--SCIANNA SYSTEM,RADIN BLOOD GROUP ANTIGEN	protein_coding
ENSG00000035664	46.88	77.47	-0.713	0.00893322	0.0701228	DAPK2	death associated protein kinase 2 [Source:HGNC Symbol;Acc:HGNC:2675]		protein_coding
ENSG00000233461	86.26	53.8	0.671	0.00855634	0.0678114	AL445524.1			antisense
ENSG00000203943	59.69	93.61	-0.641	0.00762808	0.0625853	SAMD13	sterile alpha motif domain containing 13 [Source:HGNC Symbol;Acc:HGNC:24582]		protein_coding
ENSG00000239920	57.45	90.81	-0.651	0.00647949	0.0555452	AC104389.4	Hemoglobin subunit gamma-2 [Source:UniProtKB/Swiss-Prot;Acc:P69892]		protein_coding
ENSG00000176024	40.32	68.86	-0.758	0.00704061	0.0591932	ZNF613	zinc finger protein 613 [Source:HGNC Symbol;Acc:HGNC:25827]		protein_coding
ENSG00000182568	47.82	78.54	-0.704	0.00751943	0.0620979	SATB1	SATB homeobox 1 [Source:HGNC Symbol;Acc:HGNC:10541]		protein_coding
ENSG00000272410	71.18	42.22	0.74	0.00814953	0.0651498	AC022384.1			protein_coding
ENSG00000188223	62.96	97.42	-0.622	0.00887335	0.0697902	AD000671.1			protein_coding
ENSG00000167536	84.61	52.75	0.672	0.00808316	0.0647277	DHRS13	dehydrogenase/reductase 13 [Source:HGNC Symbol;Acc:HGNC:28326]		protein_coding
ENSG00000139133	55.32	87.82	-0.657	0.00723648	0.060553	ALG10	ALG10, alpha-1,2-glucosyltransferase [Source:HGNC Symbol;Acc:HGNC:23162]	LONG QT SYNDROME 2	protein_coding
ENSG00000240356	42.74	71.69	-0.733	0.00873494	0.0689197	RPL23AP7	ribosomal protein L23a pseudogene 7 [Source:HGNC Symbol;Acc:HGNC:17336]		transcribed_processed_pseudogene
ENSG00000278817	82.13	51	0.677	0.00903029	0.0706524	AC007325.4	protein DGCR6 [Source:NCBI gene;Acc:102724770]		protein_coding
ENSG00000119574	81.57	50.57	0.679	0.00903029	0.0706524	ZBTB45	zinc finger and BTB domain containing 45 [Source:HGNC Symbol;Acc:HGNC:23715]		protein_coding
ENSG00000253958	36.57	63.48	-0.779	0.0120328	0.0881604	CLDN23	claudin 23 [Source:HGNC Symbol;Acc:HGNC:17591]		protein_coding
ENSG00000169246	45.69	75.26	-0.708	0.0106112	0.0805395	NPIPB3	nuclear pore complex interacting protein family member B3 [Source:HGNC Symbol;Acc:HGNC:28989]		protein_coding
ENSG00000177943	52.51	83.92	-0.666	0.0101139	0.0775543	MAMDC4	MAM domain containing 4 [Source:HGNC Symbol;Acc:HGNC:24083]		protein_coding
ENSG00000103599	67.88	40	0.748	0.00905782	0.0707286	IQCH	IQ motif containing H [Source:HGNC Symbol;Acc:HGNC:25721]		protein_coding
ENSG00000139946	53.44	85	-0.66	0.00808316	0.0647277	PELI2	pellino E3 ubiquitin protein ligase family member 2 [Source:HGNC Symbol;Acc:HGNC:8828]		protein_coding
ENSG00000160117	101.26	66.71	0.595	0.010679	0.0809251	ANKLE1	ankyrin repeat and LEM domain containing 1 [Source:HGNC Symbol;Acc:HGNC:26812]		protein_coding
ENSG00000213189	58.55	91.15	-0.63	0.0111213	0.0836197	BTF3L4P2	basic transcription factor 3 like 4 pseudogene 2 [Source:HGNC Symbol;Acc:HGNC:39646]		processed_pseudogene
ENSG00000167244	62.33	95.76	-0.612	0.00844769	0.0670839	IGF2	insulin like growth factor 2 [Source:HGNC Symbol;Acc:HGNC:5466]	BECKWITH-WIEDEMANN SYNDROME,Chromosome 11p15.5-Related Russell-Silver Syndrome,Beckwith-Wiedemann syndrome due to imprinting defect of 11p15,Isolated hemihyperplasia,Silver-Russell syndrome due to 11p15 microduplication,Silver-Russell syndrome due to a point mutation,Silver-Russell syndrome due to an imprinting defect of 11p15,Growth restriction severe with distinctive facies,SILVER-RUSSELL SYNDR…	protein_coding
ENSG00000165312	40.32	67.78	-0.735	0.00905782	0.0707286	OTUD1	OTU deubiquitinase 1 [Source:HGNC Symbol;Acc:HGNC:27346]		protein_coding
ENSG00000189280	40.32	67.78	-0.735	0.00905782	0.0707286	GJB5	gap junction protein beta 5 [Source:HGNC Symbol;Acc:HGNC:4287]		protein_coding
ENSG00000205795	48.75	78.54	-0.677	0.0100899	0.077395	CYS1	cystin 1 [Source:HGNC Symbol;Acc:HGNC:18525]		protein_coding
ENSG00000270069	59.07	91.45	-0.622	0.0111213	0.0836197	MIR222HG	MIR222 host gene [Source:HGNC Symbol;Acc:HGNC:49555]		lincRNA
ENSG00000122390	102.2	67.78	0.585	0.0111555	0.0836858	NAA60	N(alpha)-acetyltransferase 60, NatF catalytic subunit [Source:HGNC Symbol;Acc:HGNC:25875]		protein_coding
ENSG00000206530	55.74	87.15	-0.636	0.0118496	0.0871398	CFAP44	cilia and flagella associated protein 44 [Source:HGNC Symbol;Acc:HGNC:25631]	Non-syndromic male infertility due to sperm motility disorder,SPERMATOGENIC FAILURE 20	protein_coding
ENSG00000196218	61.88	94.68	-0.606	0.0104227	0.0793608	RYR1	ryanodine receptor 1 [Source:HGNC Symbol;Acc:HGNC:10483]	MINICORE MYOPATHY WITH EXTERNAL OPHTHALMOPLEGIA,Autosomal dominant centronuclear myopathy,Benign Samaritan congenital myopathy,Central core disease,Congenital multicore myopathy with external ophthalmoplegia,Congenital myopathy with myasthenic-like onset,Exercise-induced malignant hyperthermia,King Denborough syndrome,Lethal multiple pterygium syndrome,Malignant hyperthermia of anesthesia,Moderat…	protein_coding
ENSG00000274333	65.26	98.61	-0.588	0.00975582	0.0751948	CU633967.1	uncharacterized LOC102724219 [Source:NCBI gene;Acc:102724219]		lincRNA
ENSG00000281344	41.25	68.31	-0.714	0.0124034	0.0903883	HELLPAR	HELLP associated long non-coding RNA [Source:HGNC Symbol;Acc:HGNC:43984]	HELLP syndrome	macro_lncRNA
ENSG00000257594	44.36	72.25	-0.691	0.0118497	0.0871398	GALNT4	polypeptide N-acetylgalactosaminyltransferase 4 [Source:HGNC Symbol;Acc:HGNC:4126]		protein_coding
ENSG00000204248	56.26	87.15	-0.622	0.0118496	0.0871398	COL11A2	collagen type XI alpha 2 chain [Source:HGNC Symbol;Acc:HGNC:2187]	AUTOSOMAL RECESSIVE OTOSPONDYLOMEGAEPIPHYSEAL DYSPLASIA,DEAFNESS AUTOSOMAL DOMINANT TYPE 13,DEAFNESS AUTOSOMAL RECESSIVE TYPE 53,STICKLER SYNDROME TYPE 3,WEISSENBACHER-ZWEYMUELLER SYNDROME,Autosomal dominant non-syndromic sensorineural deafness type DFNA,Autosomal recessive non-syndromic sensorineural deafness type DFNB,Fibrochondrogenesis,Otospondylomegaepiphyseal dysplasia,Weissenbacher-Zweymul…	protein_coding
ENSG00000235288	38.98	65.18	-0.727	0.013836	0.0980308	AC099329.1			antisense
ENSG00000135338	59.07	90.38	-0.605	0.0137117	0.0974683	LCA5	LCA5, lebercilin [Source:HGNC Symbol;Acc:HGNC:31923]	Leber congenital amaurosis,Severe early-childhood-onset retinal dystrophy,LEBER CONGENITAL AMAUROSIS 5	protein_coding
ENSG00000124107	41.25	67.78	-0.703	0.0124034	0.0903883	SLPI	secretory leukocyte peptidase inhibitor [Source:HGNC Symbol;Acc:HGNC:11092]		protein_coding
ENSG00000112837	83.45	53.8	0.624	0.0164319	0.111112	TBX18	T-box 18 [Source:HGNC Symbol;Acc:HGNC:11595]	CONGENITAL ANOMALIES OF KIDNEY AND URINARY TRACT 2,Congenital hydronephrosis	protein_coding
ENSG00000074410	71.26	44.11	0.68	0.0149644	0.104049	CA12	carbonic anhydrase 12 [Source:HGNC Symbol;Acc:HGNC:1371]	Hyperchlorhidrosis isolated	protein_coding
ENSG00000279095	71.26	44.11	0.68	0.0149644	0.104049	AC243964.3			TEC
ENSG00000232098	43.13	69.94	-0.685	0.0140873	0.099398	AC012313.1			lincRNA
ENSG00000153157	38.94	64.56	-0.715	0.013836	0.0980308	SYCP2L	synaptonemal complex protein 2 like [Source:HGNC Symbol;Acc:HGNC:21537]		protein_coding
ENSG00000274512	49.98	78.43	-0.64	0.0166704	0.112112	TBC1D3L	TBC1 domain family member 3L [Source:HGNC Symbol;Acc:HGNC:51246]		protein_coding
ENSG00000205809	39.65	65.36	-0.707	0.0187406	0.122088	KLRC2	killer cell lectin like receptor C2 [Source:HGNC Symbol;Acc:HGNC:6375]		protein_coding
ENSG00000189362	56.26	86.08	-0.605	0.0146562	0.102413	NEMP2	nuclear envelope integral membrane protein 2 [Source:HGNC Symbol;Acc:HGNC:33700]		protein_coding
ENSG00000268575	78.83	50.43	0.634	0.0133802	0.0956247	AL031282.2			processed_transcript
ENSG00000187626	56.02	85.72	-0.605	0.0146562	0.102413	ZKSCAN4	zinc finger with KRAB and SCAN domains 4 [Source:HGNC Symbol;Acc:HGNC:13854]		protein_coding
ENSG00000170775	58.13	88.23	-0.594	0.0160986	0.109479	GPR37	G protein-coupled receptor 37 [Source:HGNC Symbol;Acc:HGNC:4494]		protein_coding
ENSG00000161551	40.08	65.63	-0.698	0.0147792	0.103061	ZNF577	zinc finger protein 577 [Source:HGNC Symbol;Acc:HGNC:28673]		protein_coding
ENSG00000112796	59.07	89.3	-0.588	0.0168411	0.113046	ENPP5	ectonucleotide pyrophosphatase/phosphodiesterase 5 (putative) [Source:HGNC Symbol;Acc:HGNC:13717]		protein_coding
ENSG00000110002	47.82	75.32	-0.645	0.0186931	0.121978	VWA5A	von Willebrand factor A domain containing 5A [Source:HGNC Symbol;Acc:HGNC:6658]		protein_coding
ENSG00000120337	66.57	40.89	0.69	0.015749	0.107685	TNFSF18	TNF superfamily member 18 [Source:HGNC Symbol;Acc:HGNC:11932]		protein_coding
ENSG00000183317	82.51	53.8	0.608	0.0164319	0.111112	EPHA10	EPH receptor A10 [Source:HGNC Symbol;Acc:HGNC:19987]		protein_coding
ENSG00000159110	74.85	47.7	0.639	0.0186931	0.121978	IFNAR2	interferon alpha and beta receptor subunit 2 [Source:HGNC Symbol;Acc:HGNC:5433]	Primary immunodeficiency with post-measles-mumps-rubella vaccine viral infection,HEPATITIS B VIRUS SUSCEPTIBILITY TO,IMMUNODEFICIENCY 45	protein_coding
ENSG00000214135	39.65	64.58	-0.69	0.0187406	0.122088	AC132008.2			transcribed_unprocessed_pseudogene
ENSG00000100055	42.19	67.78	-0.671	0.0167448	0.112526	CYTH4	cytohesin 4 [Source:HGNC Symbol;Acc:HGNC:9505]		protein_coding
ENSG00000231806	55.27	83.92	-0.594	0.017236	0.114793	PCAT7	prostate cancer associated transcript 7 (non-protein coding) [Source:HGNC Symbol;Acc:HGNC:48824]		antisense
ENSG00000174749	56.26	85	-0.587	0.0180558	0.119155	FAM241A	family with sequence similarity 241 member A [Source:HGNC Symbol;Acc:HGNC:26813]		protein_coding
ENSG00000155957	49.2	76.17	-0.62	0.0196771	0.126598	TMBIM4	transmembrane BAX inhibitor motif containing 4 [Source:HGNC Symbol;Acc:HGNC:24257]		protein_coding
ENSG00000248008	68.44	43.04	0.657	0.0222976	0.138369	NRAV	negative regulator of antiviral response (non-protein coding) [Source:HGNC Symbol;Acc:HGNC:48588]		antisense
ENSG00000235269	46.88	73.16	-0.631	0.0220824	0.137442	LINC02331	long intergenic non-protein coding RNA 2331 [Source:HGNC Symbol;Acc:HGNC:53251]		lincRNA
ENSG00000144306	81.57	53.8	0.591	0.0202596	0.129153	SCRN3	secernin 3 [Source:HGNC Symbol;Acc:HGNC:30382]		protein_coding
ENSG00000170293	52.51	79.62	-0.591	0.0238007	0.144739	CMTM8	CKLF like MARVEL transmembrane domain containing 8 [Source:HGNC Symbol;Acc:HGNC:19179]		protein_coding
ENSG00000188010	70.32	45.19	0.627	0.0247932	0.149215	MORN2	MORN repeat containing 2 [Source:HGNC Symbol;Acc:HGNC:30166]		protein_coding
ENSG00000238045	63.14	39.66	0.658	0.0296818	0.170469	AC009133.1			antisense
ENSG00000153993	47.82	73.16	-0.603	0.0287028	0.166341	SEMA3D	semaphorin 3D [Source:HGNC Symbol;Acc:HGNC:10726]	Hirschsprung disease	protein_coding
ENSG00000119242	49.69	75.32	-0.59	0.0314089	0.174211	CCDC92	coiled-coil domain containing 92 [Source:HGNC Symbol;Acc:HGNC:29563]		protein_coding
ENSG00000188707	49.69	75.32	-0.59	0.0314089	0.174211	ZBED6CL	ZBED6 C-terminal like [Source:HGNC Symbol;Acc:HGNC:21720]		protein_coding
ENSG00000169814	41.32	64.85	-0.638	0.025021	0.150397	BTD	biotinidase [Source:HGNC Symbol;Acc:HGNC:1122]	BIOTINIDASE DEFICIENCY	protein_coding
ENSG00000059728	38.69	61.33	-0.651	0.0351998	0.18914	MXD1	MAX dimerization protein 1 [Source:HGNC Symbol;Acc:HGNC:6761]		protein_coding
ENSG00000110195	42.19	65.63	-0.625	0.0264232	0.157131	FOLR1	folate receptor 1 [Source:HGNC Symbol;Acc:HGNC:3791]	NEURODEGENERATION DUE TO CEREBRAL FOLATE TRANSPORT DEFICIENCY,Neurodegenerative syndrome due to cerebral folate transport deficiency	protein_coding
ENSG00000160404	73.13	48.42	0.585	0.0287028	0.166341	TOR2A	torsin family 2 member A [Source:HGNC Symbol;Acc:HGNC:11996]		protein_coding
ENSG00000267575	67.56	44.4	0.595	0.0293018	0.169148	AC006504.5			lincRNA
ENSG00000124216	65.63	43.04	0.597	0.0346149	0.187327	SNAI1	snail family transcriptional repressor 1 [Source:HGNC Symbol;Acc:HGNC:11128]		protein_coding
ENSG00000126803	43.13	65.63	-0.594	0.0346149	0.187327	HSPA2	heat shock protein family A (Hsp70) member 2 [Source:HGNC Symbol;Acc:HGNC:5235]		protein_coding
ENSG00000134285	41.25	62.4	-0.586	0.0482331	0.2361	FKBP11	FK506 binding protein 11 [Source:HGNC Symbol;Acc:HGNC:18624]		protein_coding

## Sheet: Up
Supplementary Table S3. Up-regulated genes in RNA-seq data from HTC116 p53+/+ transfected cell line
ENSEMBL ID	case_72h_HCT116 p53wt_MIX	ctrl_72h_HCT116 p53wt_CTRL	log2FC	Fisher's p-value	Adjusted p-value	Associated Gene Name	Description	Phenotype description	Gene Biotype
ENSG00000278249	1133.5	307.74	1.878	0	0	SCARNA2	small Cajal body-specific RNA 2 [Source:HGNC Symbol;Acc:HGNC:32558]		scaRNA
ENSG00000203812	2602.55	1329.05	0.969	0	0	HIST2H2AA3	histone cluster 2 H2A family member a3 [Source:HGNC Symbol;Acc:HGNC:4736]		protein_coding
ENSG00000273730	694.17	188.96	1.872	0	0	RNA5-8SN2	RNA, 5.8S ribosomal N2 [Source:HGNC Symbol;Acc:HGNC:53521]		rRNA
ENSG00000274917	694.17	188.96	1.872	0	0	RNA5-8SN3	RNA, 5.8S ribosomal N3 [Source:HGNC Symbol;Acc:HGNC:53525]		rRNA
ENSG00000275215	694.17	188.96	1.872	0	0	RNA5-8SN1	RNA, 5.8S ribosomal N1 [Source:HGNC Symbol;Acc:HGNC:53517]		rRNA
ENSG00000275757	694.17	188.96	1.872	0	0	RNA5-8SN4	RNA, 5.8S ribosomal N4 [Source:HGNC Symbol;Acc:HGNC:53529]		rRNA
ENSG00000276700	694.17	188.96	1.872	0	0	RNA5-8SN4	RNA, 5.8S ribosomal N4 [Source:HGNC Symbol;Acc:HGNC:53529]		rRNA
ENSG00000277739	694.17	188.96	1.872	0	0	RNA5-8SN4	RNA, 5.8S ribosomal N4 [Source:HGNC Symbol;Acc:HGNC:53529]		rRNA
ENSG00000278189	694.17	188.96	1.872	0	0	RNA5-8SN4	RNA, 5.8S ribosomal N4 [Source:HGNC Symbol;Acc:HGNC:53529]		rRNA
ENSG00000278233	694.17	188.96	1.872	0	0	RNA5-8SN4	RNA, 5.8S ribosomal N4 [Source:HGNC Symbol;Acc:HGNC:53529]		rRNA
ENSG00000259001	3143.6	1824.04	0.785	0	0	AL355075.4			antisense
ENSG00000203852	442.87	110.95	1.987	0	0	HIST2H3A	histone cluster 2 H3 family member a [Source:HGNC Symbol;Acc:HGNC:20505]		protein_coding
ENSG00000124762	2483.68	1542.89	0.686	0	0	CDKN1A	cyclin dependent kinase inhibitor 1A [Source:HGNC Symbol;Acc:HGNC:1784]	Multiple endocrine neoplasia type 1	protein_coding
ENSG00000259040	282.08	59.65	2.223	0	0	BLOC1S5-TXNDC5	BLOC1S5-TXNDC5 readthrough (NMD candidate) [Source:HGNC Symbol;Acc:HGNC:42001]		protein_coding
ENSG00000203811	1651.24	1002.63	0.719	0	0	HIST2H3C	histone cluster 2 H3 family member c [Source:HGNC Symbol;Acc:HGNC:20503]		protein_coding
ENSG00000205670	101.18	10.06	3.208	0	0	SMIM11A	small integral membrane protein 11A [Source:HGNC Symbol;Acc:HGNC:1293]		protein_coding
ENSG00000205609	1302.63	802.45	0.698	0	0	EIF3CL	eukaryotic translation initiation factor 3 subunit C like [Source:HGNC Symbol;Acc:HGNC:26347]		protein_coding
ENSG00000015568	120.36	17.48	2.715	0	0	RGPD5	RANBP2-like and GRIP domain containing 5 [Source:HGNC Symbol;Acc:HGNC:32418]		protein_coding
ENSG00000099994	469.73	209.81	1.159	0	0	SUSD2	sushi domain containing 2 [Source:HGNC Symbol;Acc:HGNC:30667]		protein_coding
ENSG00000278828	1309.82	836	0.647	0	0	HIST1H3H	histone cluster 1 H3 family member h [Source:HGNC Symbol;Acc:HGNC:4775]		protein_coding
ENSG00000183598	1134.96	717.51	0.661	0	0	HIST2H3D	histone cluster 2 H3 family member d [Source:HGNC Symbol;Acc:HGNC:25311]		protein_coding
ENSG00000099977	876.74	517.44	0.76	0	0	DDT	D-dopachrome tautomerase [Source:HGNC Symbol;Acc:HGNC:2732]		protein_coding
ENSG00000196866	703.91	406.91	0.789	0	0	HIST1H2AD	histone cluster 1 H2A family member d [Source:HGNC Symbol;Acc:HGNC:4729]		protein_coding
ENSG00000033050	1008.98	669.57	0.591	0	0	ABCF2	ATP binding cassette subfamily F member 2 [Source:HGNC Symbol;Acc:HGNC:71]		protein_coding
ENSG00000282988	591.2	340.7	0.793	0	0	AL031777.3			protein_coding
ENSG00000092036	497.45	274.61	0.855	0	0	HAUS4	HAUS augmin like complex subunit 4 [Source:HGNC Symbol;Acc:HGNC:20163]		protein_coding
ENSG00000233822	904.41	590.44	0.614	0	0	HIST1H2BN	histone cluster 1 H2B family member n [Source:HGNC Symbol;Acc:HGNC:4749]		protein_coding
ENSG00000262814	831.64	536.89	0.63	0	0	MRPL12	mitochondrial ribosomal protein L12 [Source:HGNC Symbol;Acc:HGNC:10378]		protein_coding
ENSG00000276368	426.29	236.28	0.849	0	0	HIST1H2AJ	histone cluster 1 H2A family member j [Source:HGNC Symbol;Acc:HGNC:4727]		protein_coding
ENSG00000277157	648.81	416.39	0.639	0	0	HIST1H4D	histone cluster 1 H4 family member d [Source:HGNC Symbol;Acc:HGNC:4782]		protein_coding
ENSG00000197153	451.36	274.07	0.718	0	4e-09	HIST1H3J	histone cluster 1 H3 family member j [Source:HGNC Symbol;Acc:HGNC:4774]		protein_coding
ENSG00000105409	242.95	124.04	0.964	1e-09	3.9e-08	ATP1A3	ATPase Na+/K+ transporting subunit alpha 3 [Source:HGNC Symbol;Acc:HGNC:801]	ALTERNATING HEMIPLEGIA OF CHILDHOOD,Rapid-Onset Dystonia-Parkinsonism,Cerebellar ataxia-areflexia-pes cavus-optic atrophy-sensorineural hearing loss syndrome,ALTERNATING HEMIPLEGIA OF CHILDHOOD 2,CEREBELLAR ATAXIA AREFLEXIA PES CAVUS OPTIC ATROPHY AND SENSORINEURAL HEARING LOSS,DYSTONIA 12	protein_coding
ENSG00000197766	338.47	195.82	0.786	1e-09	6e-08	CFD	complement factor D [Source:HGNC Symbol;Acc:HGNC:2771]	Recurrent Neisseria infections due to factor D deficiency,COMPLEMENT FACTOR D DEFICIENCY	protein_coding
ENSG00000213380	192.45	91.35	1.067	2e-09	1.27e-07	COG8	component of oligomeric golgi complex 8 [Source:HGNC Symbol;Acc:HGNC:18623]	COG8-CDG	protein_coding
ENSG00000264940	331.55	193.45	0.774	1e-09	9.6e-08	SNORD3C	small nucleolar RNA, C/D box 3C [Source:HGNC Symbol;Acc:HGNC:33191]		snoRNA
ENSG00000007080	432.23	273.29	0.659	2e-09	1.5e-07	CCDC124	coiled-coil domain containing 124 [Source:HGNC Symbol;Acc:HGNC:25171]		protein_coding
ENSG00000100116	498.8	327.09	0.607	2e-09	1.53e-07	GCAT	glycine C-acetyltransferase [Source:HGNC Symbol;Acc:HGNC:4188]		protein_coding
ENSG00000085840	480.05	315.25	0.605	5e-09	3.25e-07	ORC1	origin recognition complex subunit 1 [Source:HGNC Symbol;Acc:HGNC:8487]	Meier-Gorlin syndrome 1,Ear-patella-short stature syndrome	protein_coding
ENSG00000131368	416.16	264.05	0.654	6e-09	3.66e-07	MRPS25	mitochondrial ribosomal protein S25 [Source:HGNC Symbol;Acc:HGNC:14511]		protein_coding
ENSG00000169035	375.04	232.4	0.688	7e-09	4.19e-07	KLK7	kallikrein related peptidase 7 [Source:HGNC Symbol;Acc:HGNC:6368]		protein_coding
ENSG00000122965	435.04	282.97	0.619	1.6e-08	8.47e-07	RBM19	RNA binding motif protein 19 [Source:HGNC Symbol;Acc:HGNC:29098]		protein_coding
ENSG00000268439	258.66	145.88	0.822	2.1e-08	1.137e-06	EMG1	EMG1, N1-specific pseudouridine methyltransferase [Source:HGNC Symbol;Acc:HGNC:16912]	BOWEN-CONRADI SYNDROME
ENSG00000116649	359.1	224.87	0.673	3.3e-08	1.664e-06	SRM	spermidine synthase [Source:HGNC Symbol;Acc:HGNC:11296]		protein_coding
ENSG00000137843	210.96	112.94	0.896	5.7e-08	2.758e-06	PAK6	p21 (RAC1) activated kinase 6 [Source:HGNC Symbol;Acc:HGNC:16061]		protein_coding
ENSG00000141965	117.72	49.01	1.247	9.5e-08	4.412e-06	FEM1A	fem-1 homolog A [Source:HGNC Symbol;Acc:HGNC:16934]		protein_coding
ENSG00000197409	315.69	192.75	0.709	5.5e-08	2.719e-06	HIST1H3D	histone cluster 1 H3 family member d [Source:HGNC Symbol;Acc:HGNC:4767]		protein_coding
ENSG00000184270	433.17	286.2	0.596	4.7e-08	2.338e-06	HIST2H2AB	histone cluster 2 H2A family member b [Source:HGNC Symbol;Acc:HGNC:20508]		protein_coding
ENSG00000128510	215.65	117.28	0.873	6.3e-08	3.042e-06	CPA4	carboxypeptidase A4 [Source:HGNC Symbol;Acc:HGNC:15740]		protein_coding
ENSG00000169972	309.22	188.29	0.713	6.4e-08	3.044e-06	PUSL1	pseudouridylate synthase like 1 [Source:HGNC Symbol;Acc:HGNC:26914]		protein_coding
ENSG00000188290	200.64	106.52	0.907	9.3e-08	4.372e-06	HES4	hes family bHLH transcription factor 4 [Source:HGNC Symbol;Acc:HGNC:24149]		protein_coding
ENSG00000178449	241.9	137.72	0.808	1.06e-07	4.909e-06	COX14	COX14, cytochrome c oxidase assembly factor [Source:HGNC Symbol;Acc:HGNC:28216]	MITOCHONDRIAL COMPLEX IV DEFICIENCY,Isolated cytochrome C oxidase deficiency	protein_coding
ENSG00000129451	163.14	80.7	1.007	1.67e-07	7.331e-06	KLK10	kallikrein related peptidase 10 [Source:HGNC Symbol;Acc:HGNC:6358]		protein_coding
ENSG00000254996	147.03	69.96	1.061	1.86e-07	8.044e-06	ANKHD1-EIF4EBP3	ANKHD1-EIF4EBP3 readthrough [Source:HGNC Symbol;Acc:HGNC:33530]		protein_coding
ENSG00000283321	132.28	60.48	1.116	2.18e-07	9.28e-06	AC019117.3			protein_coding
ENSG00000114779	358.16	231.33	0.628	1.88e-07	8.082e-06	ABHD14B	abhydrolase domain containing 14B [Source:HGNC Symbol;Acc:HGNC:28235]		protein_coding
ENSG00000112559	230.65	132.34	0.797	2.28e-07	9.596e-06	MDFI	MyoD family inhibitor [Source:HGNC Symbol;Acc:HGNC:6967]		protein_coding
ENSG00000083807	127.54	58.47	1.112	3.09e-07	1.2447e-05	SLC27A5	solute carrier family 27 member 5 [Source:HGNC Symbol;Acc:HGNC:10999]	Bile acid CoA ligase deficiency and defective amidation	protein_coding
ENSG00000167695	277.53	168.92	0.713	2.86e-07	1.1731e-05	FAM57A	family with sequence similarity 57 member A [Source:HGNC Symbol;Acc:HGNC:29646]		protein_coding
ENSG00000125454	235.01	136.56	0.779	4.25e-07	1.6552e-05	SLC25A19	solute carrier family 25 member 19 [Source:HGNC Symbol;Acc:HGNC:14409]	Amish lethal microcephaly,Progressive polyneuropathy with bilateral striatal necrosis,MICROCEPHALY AMISH TYPE,THIAMINE METABOLISM DYSFUNCTION SYNDROME 4 (BILATERAL STRIATAL DEGENERATION AND PROGRESSIVE POLYNEUROPATHY TYPE)	protein_coding
ENSG00000132434	223.15	128.04	0.797	4.49e-07	1.7333e-05	LANCL2	LanC like 2 [Source:HGNC Symbol;Acc:HGNC:6509]		protein_coding
ENSG00000137821	85.32	32.28	1.375	1.013e-06	3.6451e-05	LRRC49	leucine rich repeat containing 49 [Source:HGNC Symbol;Acc:HGNC:25965]		protein_coding
ENSG00000006015	343.16	222.72	0.621	5.17e-07	1.9825e-05	REX1BD	required for excision 1-B domain containing [Source:HGNC Symbol;Acc:HGNC:26098]		protein_coding
ENSG00000142684	337.28	218.29	0.625	4.97e-07	1.9115e-05	ZNF593	zinc finger protein 593 [Source:HGNC Symbol;Acc:HGNC:30943]		protein_coding
ENSG00000259075	83.2	31.55	1.371	2.159e-06	7.1765e-05	POC1B-GALNT4	POC1B-GALNT4 readthrough [Source:HGNC Symbol;Acc:HGNC:42957]		protein_coding
ENSG00000275221	204.76	116.45	0.809	7.73e-07	2.8826e-05	HIST1H2AK	histone cluster 1 H2A family member k [Source:HGNC Symbol;Acc:HGNC:4726]		protein_coding
ENSG00000133265	359.1	237.78	0.593	8.33e-07	3.0786e-05	HSPBP1	HSPA (Hsp70) binding protein 1 [Source:HGNC Symbol;Acc:HGNC:24989]		protein_coding
ENSG00000168061	282.22	176.45	0.675	8.33e-07	3.0786e-05	SAC3D1	SAC3 domain containing 1 [Source:HGNC Symbol;Acc:HGNC:30179]		protein_coding
ENSG00000142396	281.42	176.98	0.666	1.347e-06	4.713e-05	ERVK3-1	endogenous retrovirus group K3 member 1 [Source:HGNC Symbol;Acc:HGNC:30466]		protein_coding
ENSG00000164053	260.59	161.89	0.683	1.704e-06	5.8156e-05	ATRIP	ATR interacting protein [Source:HGNC Symbol;Acc:HGNC:33499]	Seckel syndrome	protein_coding
ENSG00000010438	296.28	191.52	0.627	2.877e-06	9.1776e-05	PRSS3	serine protease 3 [Source:HGNC Symbol;Acc:HGNC:9486]		protein_coding
ENSG00000158006	249.4	154.94	0.683	3.371e-06	0.000105839	PAFAH2	platelet activating factor acetylhydrolase 2 [Source:HGNC Symbol;Acc:HGNC:8579]		protein_coding
ENSG00000164897	270.96	173.23	0.642	3.815e-06	0.000117923	TMUB1	transmembrane and ubiquitin like domain containing 1 [Source:HGNC Symbol;Acc:HGNC:21709]		protein_coding
ENSG00000232024	116.51	56.81	1.023	6.323e-06	0.000182501	LSM12P1	LSM12 pseudogene 1 [Source:HGNC Symbol;Acc:HGNC:32453]		processed_pseudogene
ENSG00000100294	285.03	185.06	0.62	4.585e-06	0.00013781	MCAT	malonyl-CoA-acyl carrier protein transacylase [Source:HGNC Symbol;Acc:HGNC:29622]		protein_coding
ENSG00000175315	278.46	180.76	0.621	6.901e-06	0.000196051	CST6	cystatin E/M [Source:HGNC Symbol;Acc:HGNC:2478]		protein_coding
ENSG00000160570	244.71	154.94	0.656	7.903e-06	0.000220835	DEDD2	death effector domain containing 2 [Source:HGNC Symbol;Acc:HGNC:24450]		protein_coding
ENSG00000167964	192.21	114.05	0.748	9.672e-06	0.000264687	RAB26	RAB26, member RAS oncogene family [Source:HGNC Symbol;Acc:HGNC:14259]		protein_coding
ENSG00000138623	273.78	178.61	0.613	9.344e-06	0.000257179	SEMA7A	semaphorin 7A (John Milton Hagen blood group) [Source:HGNC Symbol;Acc:HGNC:10741]	BLOOD GROUP JOHN MILTON HAGEN SYSTEM	protein_coding
ENSG00000128228	234.4	147.4	0.666	9.688e-06	0.000264808	SDF2L1	stromal cell derived factor 2 like 1 [Source:HGNC Symbol;Acc:HGNC:10676]		protein_coding
ENSG00000148291	214.71	132.34	0.694	9.786e-06	0.000266875	SURF2	surfeit 2 [Source:HGNC Symbol;Acc:HGNC:11475]		protein_coding
ENSG00000167985	218.04	135.53	0.682	1.5375e-05	0.000391723	SDHAF2	succinate dehydrogenase complex assembly factor 2 [Source:HGNC Symbol;Acc:HGNC:26034]	Hereditary pheochromocytoma-paraganglioma,PARAGANGLIOMAS 2	protein_coding
ENSG00000051180	145.33	79.97	0.854	1.7493e-05	0.000437626	RAD51	RAD51 recombinase [Source:HGNC Symbol;Acc:HGNC:9817]	MIRROR MOVEMENTS 2,Familial congenital mirror movements,Fanconi anemia,Hereditary breast and ovarian cancer syndrome,Breast Cancer,FANCONI ANEMIA COMPLEMENTATION GROUP R	protein_coding
ENSG00000100290	195.96	118.35	0.723	1.2627e-05	0.000332885	BIK	BCL2 interacting killer [Source:HGNC Symbol;Acc:HGNC:1051]		protein_coding
ENSG00000171017	267.68	175.65	0.605	1.4693e-05	0.000379459	LRRC8E	leucine rich repeat containing 8 VRAC subunit E [Source:HGNC Symbol;Acc:HGNC:26272]		protein_coding
ENSG00000260075	100.19	48.02	1.046	2.3049e-05	0.000553907	NSFP1	N-ethylmaleimide-sensitive factor pseudogene 1 [Source:HGNC Symbol;Acc:HGNC:31405]		unprocessed_pseudogene
ENSG00000197905	224.08	140.95	0.665	1.6362e-05	0.000411869	TEAD4	TEA domain transcription factor 4 [Source:HGNC Symbol;Acc:HGNC:11717]		protein_coding
ENSG00000177602	233.46	148.48	0.649	1.5584e-05	0.000396028	HASPIN	histone H3 associated protein kinase [Source:HGNC Symbol;Acc:HGNC:19682]		protein_coding
ENSG00000197837	234.4	149.56	0.645	2.1239e-05	0.000517167	HIST4H4	histone cluster 4 H4 [Source:HGNC Symbol;Acc:HGNC:20510]		protein_coding
ENSG00000205534	180.41	108.21	0.732	2.6204e-05	0.000618499	SMG1P2	SMG1 pseudogene 2 [Source:HGNC Symbol;Acc:HGNC:49859]		unprocessed_pseudogene
ENSG00000167136	129.41	69.79	0.881	3.4762e-05	0.0007848	ENDOG	endonuclease G [Source:HGNC Symbol;Acc:HGNC:3346]		protein_coding
ENSG00000138111	247.52	161.39	0.614	1.9767e-05	0.000486787	MFSD13A	major facilitator superfamily domain containing 13A [Source:HGNC Symbol;Acc:HGNC:26196]		protein_coding
ENSG00000213337	149.79	85.06	0.809	2.6701e-05	0.0006283	ANKRD39	ankyrin repeat domain 39 [Source:HGNC Symbol;Acc:HGNC:28640]		protein_coding
ENSG00000169429	75.01	32.28	1.192	3.9186e-05	0.000871467	CXCL8	C-X-C motif chemokine ligand 8 [Source:HGNC Symbol;Acc:HGNC:6025]		protein_coding
ENSG00000185551	171.58	102.21	0.742	2.793e-05	0.000648337	NR2F2	nuclear receptor subfamily 2 group F member 2 [Source:HGNC Symbol;Acc:HGNC:7976]	Congenital heart defects multiple types 4,Complete atrioventricular canal-left heart obstruction syndrome,Complete atrioventricular canal-tetralogy of Fallot syndrome,Complete atrioventricular canal-ventricle hypoplasia syndrome,Partial atrioventricular canal	protein_coding
ENSG00000174136	172.18	102.86	0.738	3.7776e-05	0.000843261	RGMB	repulsive guidance molecule BMP co-receptor b [Source:HGNC Symbol;Acc:HGNC:26896]		protein_coding
ENSG00000132773	153.77	89.37	0.776	3.6509e-05	0.000817281	TOE1	target of EGR1, exonuclease [Source:HGNC Symbol;Acc:HGNC:15954]	Pontocerebellar hypoplasia,Pontocerebellar hypoplasia type 7,PONTOCEREBELLAR HYPOPLASIA TYPE 7	protein_coding
ENSG00000188807	215.65	137.72	0.643	3.9915e-05	0.000884384	TMEM201	transmembrane protein 201 [Source:HGNC Symbol;Acc:HGNC:33719]		protein_coding
ENSG00000104856	147.2	85	0.785	5.6479e-05	0.00118954	RELB	RELB proto-oncogene, NF-kB subunit [Source:HGNC Symbol;Acc:HGNC:9956]	IMMUNODEFICIENCY 53	protein_coding
ENSG00000204389	111.39	58.68	0.913	8.152e-05	0.00163471	HSPA1A	heat shock protein family A (Hsp70) member 1A [Source:HGNC Symbol;Acc:HGNC:5232]		protein_coding
ENSG00000175573	240.96	159.24	0.595	4.8399e-05	0.00103675	C11orf68	chromosome 11 open reading frame 68 [Source:HGNC Symbol;Acc:HGNC:28801]		protein_coding
ENSG00000187024	92.28	45.88	0.993	0.000111738	0.00213654	PTRH1	peptidyl-tRNA hydrolase 1 homolog [Source:HGNC Symbol;Acc:HGNC:27039]		protein_coding
ENSG00000158050	131.26	74.24	0.814	8.3337e-05	0.00166555	DUSP2	dual specificity phosphatase 2 [Source:HGNC Symbol;Acc:HGNC:3068]		protein_coding
ENSG00000213920	77.4	35.67	1.096	0.000144014	0.00261538	MDP1	magnesium dependent phosphatase 1 [Source:HGNC Symbol;Acc:HGNC:28781]		protein_coding
ENSG00000149929	143.25	84.45	0.755	0.000109005	0.00209267	HIRIP3	HIRA interacting protein 3 [Source:HGNC Symbol;Acc:HGNC:4917]		protein_coding
ENSG00000103254	168.77	104.37	0.688	0.00010009	0.00195134	FAM173A	family with sequence similarity 173 member A [Source:HGNC Symbol;Acc:HGNC:14152]		protein_coding
ENSG00000213066	200.2	129.51	0.624	0.00013816	0.00252178	FGFR1OP	FGFR1 oncogene partner [Source:HGNC Symbol;Acc:HGNC:17012]		protein_coding
ENSG00000137135	162.44	99.71	0.699	0.000153859	0.00276202	ARHGEF39	Rho guanine nucleotide exchange factor 39 [Source:HGNC Symbol;Acc:HGNC:25909]		protein_coding
ENSG00000223459	154.8	93.83	0.716	0.000133527	0.00245104	TCAF1P1	TRPM8 channel associated factor 1 pseudogene 1 [Source:HGNC Symbol;Acc:HGNC:33604]		unprocessed_pseudogene
ENSG00000163874	128.45	74.24	0.783	0.000177224	0.00311651	ZC3H12A	zinc finger CCCH-type containing 12A [Source:HGNC Symbol;Acc:HGNC:26259]		protein_coding
ENSG00000172663	87.2	44.11	0.967	0.000215767	0.00370688	TMEM134	transmembrane protein 134 [Source:HGNC Symbol;Acc:HGNC:26142]		protein_coding
ENSG00000234912	130.61	76.25	0.769	0.000160939	0.00287462	SNHG20	small nucleolar RNA host gene 20 [Source:HGNC Symbol;Acc:HGNC:33099]		sense_overlapping
ENSG00000099785	197.83	130.19	0.6	0.000205962	0.00355892	MARCH2	membrane associated ring-CH-type finger 2 [Source:HGNC Symbol;Acc:HGNC:28038]		protein_coding
ENSG00000204514	97.73	52.87	0.874	0.00031241	0.00507491	ZNF814	zinc finger protein 814 [Source:HGNC Symbol;Acc:HGNC:33258]		protein_coding
ENSG00000250251	143.77	87.9	0.704	0.000286861	0.00473073	PKD1P6	polycystin 1, transient receptor potential channel interacting pseudogene 6 [Source:HGNC Symbol;Acc:HGNC:30070]		transcribed_unprocessed_pseudogene
ENSG00000103248	181.89	118.35	0.616	0.000262354	0.00437685	MTHFSD	methenyltetrahydrofolate synthetase domain containing [Source:HGNC Symbol;Acc:HGNC:25778]		protein_coding
ENSG00000005189	115.98	66.71	0.789	0.000360426	0.0057339	REXO5	RNA exonuclease 5 [Source:HGNC Symbol;Acc:HGNC:24661]		protein_coding
ENSG00000173137	160.33	101.14	0.659	0.000313349	0.00508324	ADCK5	aarF domain containing kinase 5 [Source:HGNC Symbol;Acc:HGNC:21738]		protein_coding
ENSG00000214756	181.83	119.05	0.607	0.000336469	0.00541049	CSKMT	citrate synthase lysine methyltransferase [Source:HGNC Symbol;Acc:HGNC:33113]		protein_coding
ENSG00000244045	180.96	119.03	0.6	0.000410585	0.0063996	TMEM199	transmembrane protein 199 [Source:HGNC Symbol;Acc:HGNC:18085]	Disorder of Golgi homeostasis,TMEM199-CDG,CONGENITAL DISORDER OF GLYCOSYLATION TYPE IIp	protein_coding
ENSG00000169136	88.28	47.21	0.889	0.000527314	0.00784481	ATF5	activating transcription factor 5 [Source:HGNC Symbol;Acc:HGNC:790]		protein_coding
ENSG00000243449	112.51	65.63	0.769	0.000548335	0.0081172	C4orf48	chromosome 4 open reading frame 48 [Source:HGNC Symbol;Acc:HGNC:34437]		protein_coding
ENSG00000149809	172.52	112.97	0.606	0.000464737	0.00712269	TM7SF2	transmembrane 7 superfamily member 2 [Source:HGNC Symbol;Acc:HGNC:11863]		protein_coding
ENSG00000254505	176.86	116.69	0.596	0.000557065	0.00819768	CHMP4A	charged multivesicular body protein 4A [Source:HGNC Symbol;Acc:HGNC:20274]		protein_coding
ENSG00000161980	97.43	54.87	0.817	0.000824649	0.011316	POLR3K	RNA polymerase III subunit K [Source:HGNC Symbol;Acc:HGNC:14121]		protein_coding
ENSG00000108641	126.57	77.18	0.706	0.000568706	0.00832578	B9D1	B9 domain containing 1 [Source:HGNC Symbol;Acc:HGNC:24123]	Meckel syndrome 9,Joubert Syndrome,Meckel syndrome,JOUBERT SYNDROME 27,MECKEL SYNDROME TYPE 9	protein_coding
ENSG00000276386	75.35	39.02	0.932	0.000959168	0.0128228	CNTNAP3P2	contactin associated protein-like 3 pseudogene 2 [Source:HGNC Symbol;Acc:HGNC:49589]		unprocessed_pseudogene
ENSG00000178096	99.38	57.02	0.791	0.000966094	0.0128577	BOLA1	bolA family member 1 [Source:HGNC Symbol;Acc:HGNC:24263]		protein_coding
ENSG00000117242	80.27	42.81	0.891	0.00108439	0.0140027	PINK1-AS	PINK1 antisense RNA [Source:HGNC Symbol;Acc:HGNC:38872]		antisense
ENSG00000270170	102.2	59.18	0.778	0.000876089	0.0119055	NCBP2-AS2	NCBP2 antisense RNA 2 (head to head) [Source:HGNC Symbol;Acc:HGNC:25121]		protein_coding
ENSG00000284491	167.9	111.28	0.589	0.00077084	0.0106883	THSD8	thrombospondin type 1 domain containing 8 [Source:HGNC Symbol;Acc:HGNC:53785]		protein_coding
ENSG00000146410	89.07	49.49	0.835	0.000835975	0.011432	MTFR2	mitochondrial fission regulator 2 [Source:HGNC Symbol;Acc:HGNC:21115]		protein_coding
ENSG00000185710	112.12	67.18	0.73	0.00095285	0.0127526	SMG1P4	SMG1 pseudogene 4 [Source:HGNC Symbol;Acc:HGNC:49861]		transcribed_unprocessed_pseudogene
ENSG00000183597	165.02	109.53	0.587	0.00109097	0.0140493	TANGO2	transport and golgi organization 2 homolog [Source:HGNC Symbol;Acc:HGNC:25439]	Infancy-Onset Recurrent Metabolic Crises with Encephalocardiomyopathy,Recurrent metabolic encephalomyopathic crises-rhabdomyolysis-cardiac arrhythmia-intellectual disability syndrome,METABOLIC ENCEPHALOMYOPATHIC CRISES RECURRENT WITH RHABDOMYOLYSIS CARDIAC ARRHYTHMIAS AND NEURODEGENERATION	protein_coding
ENSG00000106689	69.38	35.51	0.947	0.00165899	0.0196566	LHX2	LIM homeobox 2 [Source:HGNC Symbol;Acc:HGNC:6594]		protein_coding
ENSG00000196544	125.48	77.95	0.68	0.00118983	0.0150946	BORCS6	BLOC-1 related complex subunit 6 [Source:HGNC Symbol;Acc:HGNC:25939]		protein_coding
ENSG00000148950	70.32	36.58	0.924	0.00184008	0.0213361	IMMP1L	inner mitochondrial membrane peptidase subunit 1 [Source:HGNC Symbol;Acc:HGNC:26317]		protein_coding
ENSG00000187630	150.35	98.57	0.604	0.00148108	0.0180413	DHRS4L2	dehydrogenase/reductase 4 like 2 [Source:HGNC Symbol;Acc:HGNC:19731]		protein_coding
ENSG00000143333	91.88	52.72	0.79	0.00151186	0.0183227	RGS16	regulator of G protein signaling 16 [Source:HGNC Symbol;Acc:HGNC:9997]		protein_coding
ENSG00000228594	68.44	35.51	0.927	0.00220938	0.0244085	FNDC10	fibronectin type III domain containing 10 [Source:HGNC Symbol;Acc:HGNC:42951]		protein_coding
ENSG00000196569	110.64	67.35	0.708	0.00120596	0.0152366	LAMA2	laminin subunit alpha 2 [Source:HGNC Symbol;Acc:HGNC:6482]	Congenital Muscular Dystrophy,Congenital muscular dystrophy type 1A,MUSCULAR DYSTROPHY CONGENITAL MEROSIN-DEFICIENT 1A	protein_coding
ENSG00000133027	127.51	80.7	0.653	0.00140471	0.0173233	PEMT	phosphatidylethanolamine N-methyltransferase [Source:HGNC Symbol;Acc:HGNC:8830]		protein_coding
ENSG00000262943	87.2	49.49	0.805	0.00141859	0.0174584	ALOX12P2	arachidonate 12-lipoxygenase pseudogene 2 [Source:HGNC Symbol;Acc:HGNC:432]		transcribed_unprocessed_pseudogene
ENSG00000205643	98.45	58.1	0.751	0.0017043	0.0201236	CDPF1	cysteine rich DPF motif domain containing 1 [Source:HGNC Symbol;Acc:HGNC:33710]		protein_coding
ENSG00000214826	76.6	41.89	0.855	0.00171048	0.02018	DDX12P	DEAD/H-box helicase 12, pseudogene [Source:HGNC Symbol;Acc:HGNC:2737]		unprocessed_pseudogene
ENSG00000023445	145.33	95.76	0.597	0.00192704	0.0220283	BIRC3	baculoviral IAP repeat containing 3 [Source:HGNC Symbol;Acc:HGNC:591]	MALT lymphoma	protein_coding
ENSG00000276710	78.48	43.45	0.838	0.00187304	0.0216213	CSPG4P10	chondroitin sulfate proteoglycan 4 pseudogene 10 [Source:HGNC Symbol;Acc:HGNC:48361]		transcribed_unprocessed_pseudogene
ENSG00000165886	142.51	93.61	0.601	0.00176206	0.0206726	UBTD1	ubiquitin domain containing 1 [Source:HGNC Symbol;Acc:HGNC:25683]		protein_coding
ENSG00000024862	108.76	66.71	0.697	0.00191399	0.0219478	CCDC28A	coiled-coil domain containing 28A [Source:HGNC Symbol;Acc:HGNC:21098]		protein_coding
ENSG00000008517	73.13	39.81	0.861	0.00245575	0.0264567	IL32	interleukin 32 [Source:HGNC Symbol;Acc:HGNC:16830]		protein_coding
ENSG00000142544	78.76	44.11	0.822	0.00204498	0.0229752	CTU1	cytosolic thiouridylase subunit 1 [Source:HGNC Symbol;Acc:HGNC:29590]		protein_coding
ENSG00000261373	119.44	75.67	0.652	0.00254271	0.027213	VPS9D1-AS1	VPS9D1 antisense RNA 1 [Source:HGNC Symbol;Acc:HGNC:48915]		antisense
ENSG00000148803	95.63	57.02	0.736	0.00202483	0.0228228	FUOM	fucose mutarotase [Source:HGNC Symbol;Acc:HGNC:24733]		protein_coding
ENSG00000284976	135.01	88.23	0.608	0.00199937	0.0226011	BX255925.3			protein_coding
ENSG00000135097	129.39	83.92	0.619	0.00249017	0.026743	MSI1	musashi RNA binding protein 1 [Source:HGNC Symbol;Acc:HGNC:7330]	MSI1-associated Microcephaly	protein_coding
ENSG00000165060	111.27	69.82	0.665	0.00284404	0.0296344	FXN	frataxin [Source:HGNC Symbol;Acc:HGNC:3951]	FRIEDREICH ATAXIA,FRIEDREICH ATAXIA 1	protein_coding
ENSG00000186654	136.94	90.97	0.585	0.00279967	0.0292634	PRR5	proline rich 5 [Source:HGNC Symbol;Acc:HGNC:31682]		protein_coding
ENSG00000115274	109.39	68.91	0.659	0.00334959	0.033697	INO80B	INO80 complex subunit B [Source:HGNC Symbol;Acc:HGNC:13324]		protein_coding
ENSG00000165449	120.95	78.54	0.617	0.0036348	0.0358863	SLC16A9	solute carrier family 16 member 9 [Source:HGNC Symbol;Acc:HGNC:23520]		protein_coding
ENSG00000217555	115.93	74.86	0.624	0.00368695	0.0363261	CKLF	chemokine like factor [Source:HGNC Symbol;Acc:HGNC:13253]		protein_coding
ENSG00000139410	94.7	58.1	0.695	0.00347214	0.034552	SDSL	serine dehydratase like [Source:HGNC Symbol;Acc:HGNC:30404]		protein_coding
ENSG00000225648	110.64	71.01	0.633	0.00372231	0.0365687	SBDSP1	SBDS, ribosome maturation factor pseudogene 1 [Source:HGNC Symbol;Acc:HGNC:21646]		transcribed_unprocessed_pseudogene
ENSG00000160767	123.76	81.77	0.592	0.00416996	0.0397123	FAM189B	family with sequence similarity 189 member B [Source:HGNC Symbol;Acc:HGNC:1233]		protein_coding
ENSG00000219410	102.47	64.67	0.656	0.00518471	0.0467915	AC125494.1			bidirectional_promoter_lncRNA
ENSG00000260121	64.55	35.67	0.838	0.00507728	0.0460694	AC138028.4			antisense
ENSG00000132563	65.63	36.58	0.826	0.00553579	0.0492913	REEP2	receptor accessory protein 2 [Source:HGNC Symbol;Acc:HGNC:17975]	Autosomal spastic paraplegia type 72,Spastic paraplegia 72 autosomal recessive	protein_coding
ENSG00000113240	100.32	63.48	0.652	0.00465562	0.042961	CLK4	CDC like kinase 4 [Source:HGNC Symbol;Acc:HGNC:13659]		protein_coding
ENSG00000283378	67.08	37.74	0.813	0.00601596	0.0525857	BX088645.1	contactin associated protein-like 3-like [Source:NCBI gene;Acc:100289279]		protein_coding
ENSG00000103876	117.2	77.47	0.591	0.00497892	0.0454	FAH	fumarylacetoacetate hydrolase [Source:HGNC Symbol;Acc:HGNC:3579]	Tyrosinemia type 1,TYROSINEMIA TYPE I	protein_coding
ENSG00000124444	113.93	75.13	0.594	0.00556593	0.0495411	ZNF576	zinc finger protein 576 [Source:HGNC Symbol;Acc:HGNC:28357]		protein_coding
ENSG00000198890	99.38	63.48	0.639	0.00579243	0.0511014	PRMT6	protein arginine methyltransferase 6 [Source:HGNC Symbol;Acc:HGNC:18241]		protein_coding
ENSG00000142920	70.32	40.89	0.768	0.00758466	0.0624113	AZIN2	antizyme inhibitor 2 [Source:HGNC Symbol;Acc:HGNC:29957]		protein_coding
ENSG00000162650	68.44	39.81	0.767	0.00905782	0.0707286	ATXN7L2	ataxin 7 like 2 [Source:HGNC Symbol;Acc:HGNC:28713]		protein_coding
ENSG00000233461	86.26	53.8	0.671	0.00855634	0.0678114	AL445524.1			antisense
ENSG00000272410	71.18	42.22	0.74	0.00814953	0.0651498	AC022384.1			protein_coding
ENSG00000167536	84.61	52.75	0.672	0.00808316	0.0647277	DHRS13	dehydrogenase/reductase 13 [Source:HGNC Symbol;Acc:HGNC:28326]		protein_coding
ENSG00000278817	82.13	51	0.677	0.00903029	0.0706524	AC007325.4	protein DGCR6 [Source:NCBI gene;Acc:102724770]		protein_coding
ENSG00000119574	81.57	50.57	0.679	0.00903029	0.0706524	ZBTB45	zinc finger and BTB domain containing 45 [Source:HGNC Symbol;Acc:HGNC:23715]		protein_coding
ENSG00000103599	67.88	40	0.748	0.00905782	0.0707286	IQCH	IQ motif containing H [Source:HGNC Symbol;Acc:HGNC:25721]		protein_coding
ENSG00000160117	101.26	66.71	0.595	0.010679	0.0809251	ANKLE1	ankyrin repeat and LEM domain containing 1 [Source:HGNC Symbol;Acc:HGNC:26812]		protein_coding
ENSG00000122390	102.2	67.78	0.585	0.0111555	0.0836858	NAA60	N(alpha)-acetyltransferase 60, NatF catalytic subunit [Source:HGNC Symbol;Acc:HGNC:25875]		protein_coding
ENSG00000112837	83.45	53.8	0.624	0.0164319	0.111112	TBX18	T-box 18 [Source:HGNC Symbol;Acc:HGNC:11595]	CONGENITAL ANOMALIES OF KIDNEY AND URINARY TRACT 2,Congenital hydronephrosis	protein_coding
ENSG00000074410	71.26	44.11	0.68	0.0149644	0.104049	CA12	carbonic anhydrase 12 [Source:HGNC Symbol;Acc:HGNC:1371]	Hyperchlorhidrosis isolated	protein_coding
ENSG00000279095	71.26	44.11	0.68	0.0149644	0.104049	AC243964.3			TEC
ENSG00000268575	78.83	50.43	0.634	0.0133802	0.0956247	AL031282.2			processed_transcript
ENSG00000120337	66.57	40.89	0.69	0.015749	0.107685	TNFSF18	TNF superfamily member 18 [Source:HGNC Symbol;Acc:HGNC:11932]		protein_coding
ENSG00000183317	82.51	53.8	0.608	0.0164319	0.111112	EPHA10	EPH receptor A10 [Source:HGNC Symbol;Acc:HGNC:19987]		protein_coding
ENSG00000159110	74.85	47.7	0.639	0.0186931	0.121978	IFNAR2	interferon alpha and beta receptor subunit 2 [Source:HGNC Symbol;Acc:HGNC:5433]	Primary immunodeficiency with post-measles-mumps-rubella vaccine viral infection,HEPATITIS B VIRUS SUSCEPTIBILITY TO,IMMUNODEFICIENCY 45	protein_coding
ENSG00000248008	68.44	43.04	0.657	0.0222976	0.138369	NRAV	negative regulator of antiviral response (non-protein coding) [Source:HGNC Symbol;Acc:HGNC:48588]		antisense
ENSG00000144306	81.57	53.8	0.591	0.0202596	0.129153	SCRN3	secernin 3 [Source:HGNC Symbol;Acc:HGNC:30382]		protein_coding
ENSG00000188010	70.32	45.19	0.627	0.0247932	0.149215	MORN2	MORN repeat containing 2 [Source:HGNC Symbol;Acc:HGNC:30166]		protein_coding
ENSG00000238045	63.14	39.66	0.658	0.0296818	0.170469	AC009133.1			antisense
ENSG00000160404	73.13	48.42	0.585	0.0287028	0.166341	TOR2A	torsin family 2 member A [Source:HGNC Symbol;Acc:HGNC:11996]		protein_coding
ENSG00000267575	67.56	44.4	0.595	0.0293018	0.169148	AC006504.5			lincRNA
ENSG00000124216	65.63	43.04	0.597	0.0346149	0.187327	SNAI1	snail family transcriptional repressor 1 [Source:HGNC Symbol;Acc:HGNC:11128]		protein_coding

## Sheet: Down
Supplementary Table S3. Downregulated genes in RNA-seq data from HTC116 p53+/+ transfected cell line
ENSEMBL ID	case_72h_HCT116 p53wt_MIX	ctrl_72h_HCT116 p53wt_CTRL	log2FC	Fisher's p-value	Adjusted p-value	Associated Gene Name	Description	Phenotype description	Gene Biotype
ENSG00000206585	19382.7	33939	-0.808	0	0	RNVU1-7	RNA, variant U1 small nuclear 7 [Source:HGNC Symbol;Acc:HGNC:37500]		snRNA
ENSG00000206596	6749.32	11517.7	-0.771	0	0	RNU1-27P	RNA, U1 small nuclear 27, pseudogene [Source:HGNC Symbol;Acc:HGNC:37497]		snRNA
ENSG00000207005	6749.32	11517.7	-0.771	0	0	RNU1-2	RNA, U1 small nuclear 2 [Source:HGNC Symbol;Acc:HGNC:10123]		snRNA
ENSG00000207389	6749.32	11517.7	-0.771	0	0	RNU1-4	RNA, U1 small nuclear 4 [Source:HGNC Symbol;Acc:HGNC:10128]		snRNA
ENSG00000273768	6749.32	11517.7	-0.771	0	0	RF00003			snRNA
ENSG00000206588	10137.1	15492.6	-0.612	0	0	RNU1-28P	RNA, U1 small nuclear 28, pseudogene [Source:HGNC Symbol;Acc:HGNC:37498]		snRNA
ENSG00000206652	10137.1	15492.6	-0.612	0	0	RNU1-1	RNA, U1 small nuclear 1 [Source:HGNC Symbol;Acc:HGNC:10120]		snRNA
ENSG00000206737	10137.1	15492.6	-0.612	0	0	RNVU1-18	RNA, variant U1 small nuclear 18 [Source:HGNC Symbol;Acc:HGNC:37496]		snRNA
ENSG00000207513	10137.1	15492.6	-0.612	0	0	RNU1-3	RNA, U1 small nuclear 3 [Source:HGNC Symbol;Acc:HGNC:10130]		snRNA
ENSG00000275405	10137.1	15492.6	-0.612	0	0	RF00003			snRNA
ENSG00000202198	0	142.96	-7.17	0	0	RF00100			misc_RNA
ENSG00000251562	7157.58	10995	-0.619	0	0	MALAT1	metastasis associated lung adenocarcinoma transcript 1 (non-protein coding) [Source:HGNC Symbol;Acc:HGNC:29665]		lincRNA
ENSG00000202538	1617.35	3281.61	-1.02	0	0	RNU4-2	RNA, U4 small nuclear 2 [Source:HGNC Symbol;Acc:HGNC:10193]		snRNA
ENSG00000270722	3860.61	6235.54	-0.692	0	0	RF00003			snRNA
ENSG00000277918	3161.89	5074.19	-0.682	0	0	RF00003			snRNA
ENSG00000200795	1171.99	2142.19	-0.87	0	0	RNU4-1	RNA, U4 small nuclear 1 [Source:HGNC Symbol;Acc:HGNC:10192]		snRNA
ENSG00000200320	1105.48	1863.38	-0.753	0	0	SNORA63	small nucleolar RNA, H/ACA box 63 [Source:HGNC Symbol;Acc:HGNC:10106]		snoRNA
ENSG00000207445	447.23	914.55	-1.03	0	0	SNORD15B	small nucleolar RNA, C/D box 15B [Source:HGNC Symbol;Acc:HGNC:16649]		snoRNA
ENSG00000273590	7.58	99.69	-3.553	0	0	SMIM11B	small integral membrane protein 11B [Source:HGNC Symbol;Acc:HGNC:51846]		protein_coding
ENSG00000245532	1068.86	1699.98	-0.669	0	0	NEAT1	nuclear paraspeckle assembly transcript 1 (non-protein coding) [Source:HGNC Symbol;Acc:HGNC:30815]		lincRNA
ENSG00000199785	272.45	615.82	-1.174	0	0	SNORA52	small nucleolar RNA, H/ACA box 52 [Source:HGNC Symbol;Acc:HGNC:32645]		snoRNA
ENSG00000198743	632.67	1091.54	-0.786	0	0	SLC5A3	solute carrier family 5 member 3 [Source:HGNC Symbol;Acc:HGNC:11038]		protein_coding
ENSG00000283029	142.21	356.04	-1.318	0	0	AL139099.4
ENSG00000285505	26.88	132.56	-2.26	0	0	AC010616.2			protein_coding
ENSG00000257411	12.84	89.75	-2.713	0	0	AC034102.2			protein_coding
ENSG00000221420	166.77	361.78	-1.113	0	0	SNORA81	small nucleolar RNA, H/ACA box 81 [Source:HGNC Symbol;Acc:HGNC:32667]		snoRNA
ENSG00000134755	665.69	1008.15	-0.598	0	0	DSC2	desmocollin 2 [Source:HGNC Symbol;Acc:HGNC:3036]	Familial isolated arrhythmogenic ventricular dysplasia biventricular form,Familial isolated arrhythmogenic ventricular dysplasia left dominant form,Familial isolated arrhythmogenic ventricular dysplasia right dominant form,ARRHYTHMOGENIC RIGHT VENTRICULAR DYSPLASIA FAMILIAL 11	protein_coding
ENSG00000078114	540.99	833.85	-0.623	0	0	NEBL	nebulette [Source:HGNC Symbol;Acc:HGNC:16932]	Familial isolated dilated cardiomyopathy	protein_coding
ENSG00000269891	22.76	98.64	-2.068	0	0	ARHGAP19-SLIT1	ARHGAP19-SLIT1 readthrough (NMD candidate) [Source:HGNC Symbol;Acc:HGNC:48348]		protein_coding
ENSG00000168453	401.29	648.79	-0.692	0	0	HR	HR, lysine demethylase and nuclear receptor corepressor [Source:HGNC Symbol;Acc:HGNC:5172]	Alopecia universalis,ATRICHIA WITH PAPULAR LESIONS,Marie Unna hereditary hypotrichosis,ALOPECIA UNIVERSALIS CONGENITA,HYPOTRICHOSIS 4	protein_coding
ENSG00000267469	101.41	233.99	-1.198	0	0	AC005944.1			antisense
ENSG00000235174	469.37	721.61	-0.619	0	0	RPL39P3	ribosomal protein L39 pseudogene 3 [Source:HGNC Symbol;Acc:HGNC:21383]		processed_pseudogene
ENSG00000114796	405.98	635.88	-0.646	0	0	KLHL24	kelch like family member 24 [Source:HGNC Symbol;Acc:HGNC:25947]	EPIDERMOLYSIS BULLOSA SIMPLEX GENERALIZED WITH SCARRING AND HAIRLOSS	protein_coding
ENSG00000276027	54.13	146.81	-1.423	0	3e-09	RNU12	RNA, U12 small nuclear [Source:HGNC Symbol;Acc:HGNC:19380]		snRNA
ENSG00000277194	160.85	307.46	-0.93	0	1e-09	SNORD22	small nucleolar RNA, C/D box 22 [Source:HGNC Symbol;Acc:HGNC:10145]		snoRNA
ENSG00000276161	463.9	696.13	-0.585	0	1e-09	SNORA17B	small nucleolar RNA, H/ACA box 17B [Source:HGNC Symbol;Acc:HGNC:32636]		snoRNA
ENSG00000248710	86.71	197.56	-1.179	0	4e-09	AC079594.2			protein_coding
ENSG00000146278	313.16	504.61	-0.687	0	2e-09	PNRC1	proline rich nuclear receptor coactivator 1 [Source:HGNC Symbol;Acc:HGNC:17278]		protein_coding
ENSG00000255073	23.78	87.94	-1.844	1e-09	6.4e-08	ZFP91-CNTF	ZFP91-CNTF readthrough (NMD candidate) [Source:HGNC Symbol;Acc:HGNC:33441]		protein_coding
ENSG00000208772	191.27	340	-0.827	0	8e-09	SNORD94	small nucleolar RNA, C/D box 94 [Source:HGNC Symbol;Acc:HGNC:32756]		snoRNA
ENSG00000180747	209.35	358.67	-0.774	0	2.5e-08	SMG1P3	SMG1 pseudogene 3 [Source:HGNC Symbol;Acc:HGNC:49860]		transcribed_unprocessed_pseudogene
ENSG00000059804	184.71	321.71	-0.797	1e-09	8.7e-08	SLC2A3	solute carrier family 2 member 3 [Source:HGNC Symbol;Acc:HGNC:11007]	HUNTINGTON DISEASE	protein_coding
ENSG00000215252	204.29	346.4	-0.759	1e-09	1.03e-07	GOLGA8B	golgin A8 family member B [Source:HGNC Symbol;Acc:HGNC:31973]		protein_coding
ENSG00000182621	257.84	405.63	-0.652	1e-08	5.84e-07	PLCB1	phospholipase C beta 1 [Source:HGNC Symbol;Acc:HGNC:15917]	Epileptic Encephalopathy Early Infantile 12,Malignant migrating partial seizures of infancy,West syndrome	protein_coding
ENSG00000008086	60.94	139.87	-1.185	2.5e-08	1.32e-06	CDKL5	cyclin dependent kinase like 5 [Source:HGNC Symbol;Acc:HGNC:11411]	EPILEPTIC ENCEPHALOPATHY EARLY INFANTILE TYPE 2,Atypical Rett syndrome,Early infantile epileptic encephalopathy,West syndrome,EPILEPTIC ENCEPHALOPATHY EARLY INFANTILE 2	protein_coding
ENSG00000172915	98.45	194.74	-0.977	1.5e-08	8.37e-07	NBEA	neurobeachin [Source:HGNC Symbol;Acc:HGNC:7648]		protein_coding
ENSG00000172780	45.65	114.62	-1.309	5.3e-08	2.61e-06	RAB43	RAB43, member RAS oncogene family [Source:HGNC Symbol;Acc:HGNC:19983]		protein_coding
ENSG00000134013	286.87	437.83	-0.608	2.3e-08	1.201e-06	LOXL2	lysyl oxidase like 2 [Source:HGNC Symbol;Acc:HGNC:6666]		protein_coding
ENSG00000250920	246.59	387.34	-0.649	3e-08	1.539e-06	AC105460.1			lincRNA
ENSG00000143457	189.39	314.17	-0.727	2.8e-08	1.43e-06	GOLPH3L	golgi phosphoprotein 3 like [Source:HGNC Symbol;Acc:HGNC:24882]		protein_coding
ENSG00000163346	233.46	370.12	-0.663	2.7e-08	1.393e-06	PBXIP1	PBX homeobox interacting protein 1 [Source:HGNC Symbol;Acc:HGNC:21199]		protein_coding
ENSG00000115414	283.15	427.15	-0.591	7.3e-08	3.459e-06	FN1	fibronectin 1 [Source:HGNC Symbol;Acc:HGNC:3778]	Spondylometaphyseal Dysplasia with Corner Fractures,Fibronectin glomerulopathy,Spondylometaphyseal dysplasia ^corner fracture^ type,GLOMERULOPATHY WITH FIBRONECTIN DEPOSITS 2,PLASMA FIBRONECTIN DEFICIENCY	protein_coding
ENSG00000174501	138.8	242.61	-0.801	1.15e-07	5.238e-06	ANKRD36C	ankyrin repeat domain 36C [Source:HGNC Symbol;Acc:HGNC:32946]		protein_coding
ENSG00000137440	191.27	308.79	-0.688	1.47e-07	6.557e-06	FGFBP1	fibroblast growth factor binding protein 1 [Source:HGNC Symbol;Acc:HGNC:19695]		protein_coding
ENSG00000259976	119.75	212.57	-0.823	3.91e-07	1.5371e-05	AC093010.3			3prime_overlapping_ncRNA
ENSG00000238622	67.45	139.82	-1.041	4.3e-07	1.6721e-05	SNORD97	small nucleolar RNA, C/D box 97 [Source:HGNC Symbol;Acc:HGNC:32760]		snoRNA
ENSG00000006459	240.96	365.82	-0.6	4.41e-07	1.7102e-05	KDM7A	lysine demethylase 7A [Source:HGNC Symbol;Acc:HGNC:22224]		protein_coding
ENSG00000262001	48.75	110.82	-1.168	1.052e-06	3.7654e-05	DLGAP1-AS2	DLGAP1 antisense RNA 2 [Source:HGNC Symbol;Acc:HGNC:28146]		antisense
ENSG00000170222	34.69	88.23	-1.322	1.935e-06	6.5311e-05	ADPRM	ADP-ribose/CDP-alcohol diphosphatase, manganese dependent [Source:HGNC Symbol;Acc:HGNC:30925]		protein_coding
ENSG00000174428	89.7	168.15	-0.899	1.372e-06	4.7938e-05	GTF2IRD2B	GTF2I repeat domain containing 2B [Source:HGNC Symbol;Acc:HGNC:33125]		protein_coding
ENSG00000103489	115.32	202.28	-0.805	1.177e-06	4.1855e-05	XYLT1	xylosyltransferase 1 [Source:HGNC Symbol;Acc:HGNC:15516]	DESBUQUOIS DYSPLASIA 2,Desbuquois syndrome,XYLT1-CDG,Pseudoxanthoma elasticum	protein_coding
ENSG00000197635	100.32	180.76	-0.843	1.554e-06	5.3658e-05	DPP4	dipeptidyl peptidase 4 [Source:HGNC Symbol;Acc:HGNC:3009]		protein_coding
ENSG00000095539	88.7	164.34	-0.882	2.799e-06	8.9543e-05	SEMA4G	semaphorin 4G [Source:HGNC Symbol;Acc:HGNC:10735]		protein_coding
ENSG00000238105	59.32	122.66	-1.036	2.4e-06	7.8351e-05	GOLGA2P5	GOLGA2 pseudogene 5 [Source:HGNC Symbol;Acc:HGNC:25315]		transcribed_unprocessed_pseudogene
ENSG00000103034	113.45	196.9	-0.79	2.119e-06	7.0622e-05	NDRG4	NDRG family member 4 [Source:HGNC Symbol;Acc:HGNC:14466]		protein_coding
ENSG00000164638	179.08	279.74	-0.641	2.792e-06	8.9423e-05	SLC29A4	solute carrier family 29 member 4 [Source:HGNC Symbol;Acc:HGNC:23097]		protein_coding
ENSG00000188488	87.2	160.31	-0.871	3.966e-06	0.000122024	SERPINA5	serpin family A member 5 [Source:HGNC Symbol;Acc:HGNC:8723]		protein_coding
ENSG00000150977	129.39	216.26	-0.737	3.263e-06	0.000103008	RILPL2	Rab interacting lysosomal protein like 2 [Source:HGNC Symbol;Acc:HGNC:28787]		protein_coding
ENSG00000251349	55.06	115.01	-1.049	4.87e-06	0.000144982	MSANTD3-TMEFF1	MSANTD3-TMEFF1 readthrough [Source:HGNC Symbol;Acc:HGNC:38838]		protein_coding
ENSG00000138764	187.52	289.43	-0.623	4.328e-06	0.000131573	CCNG2	cyclin G2 [Source:HGNC Symbol;Acc:HGNC:1593]		protein_coding
ENSG00000145358	143.45	233.48	-0.699	4.013e-06	0.000123092	DDIT4L	DNA damage inducible transcript 4 like [Source:HGNC Symbol;Acc:HGNC:30555]		protein_coding
ENSG00000114270	56.26	116.2	-1.033	5.558e-06	0.000162329	COL7A1	collagen type VII alpha 1 chain [Source:HGNC Symbol;Acc:HGNC:2214]	Acral dystrophic epidermolysis bullosa,Centripetalis recessive dystrophic epidermolysis bullosa,Dominant dystrophic epidermolysis bullosa nails only,Dystrophic epidermolysis bullosa pruriginosa,Epidermolysis bullosa simplex superficialis,Generalized dominant dystrophic epidermolysis bullosa,Pretibial dystrophic epidermolysis bullosa,Recessive dystrophic epidermolysis bullosa inversa,Recessive dys…	protein_coding
ENSG00000113916	146.26	236.71	-0.691	3.849e-06	0.000118806	BCL6	B cell CLL/lymphoma 6 [Source:HGNC Symbol;Acc:HGNC:1001]	Follicular lymphoma,High grade B-cell lymphoma with MYC and/ or BCL2 and/or BCL6 rearrangement,Intravascular large B-cell lymphoma,Primary mediastinal large B-cell lymphoma	protein_coding
ENSG00000185973	51.75	108.71	-1.056	8.288e-06	0.000230771	TMLHE	trimethyllysine hydroxylase, epsilon [Source:HGNC Symbol;Acc:HGNC:18308]	AUTISM SUSCEPTIBILITY TO X-LINKED 6	protein_coding
ENSG00000164463	130.33	215.19	-0.719	5.515e-06	0.000161293	CREBRF	CREB3 regulatory factor [Source:HGNC Symbol;Acc:HGNC:24050]		protein_coding
ENSG00000186417	30.94	76.39	-1.277	1.6028e-05	0.000405162	GLDN	gliomedin [Source:HGNC Symbol;Acc:HGNC:29514]	Lethal arthroogryposis,LETHAL CONGENITAL CONTRACTURE SYNDROME 11	protein_coding
ENSG00000285000	110.44	187.91	-0.761	7.302e-06	0.000206222	AC008581.2			protein_coding
ENSG00000242259	160.81	251.76	-0.643	8.766e-06	0.000242945	C22orf39	chromosome 22 open reading frame 39 [Source:HGNC Symbol;Acc:HGNC:27012]		protein_coding
ENSG00000205560	87.88	157.09	-0.831	1.2336e-05	0.000326361	CPT1B	carnitine palmitoyltransferase 1B [Source:HGNC Symbol;Acc:HGNC:2329]		protein_coding
ENSG00000279117	110.64	187.21	-0.753	1.2603e-05	0.000332672	AP001972.5			TEC
ENSG00000151150	177.07	270.06	-0.606	1.2639e-05	0.000332885	ANK3	ankyrin 3 [Source:HGNC Symbol;Acc:HGNC:494]	Intellectual disability-hypotonia-spasticity-sleep disorder syndrome,MENTAL RETARDATION AUTOSOMAL RECESSIVE 37	protein_coding
ENSG00000172159	30	73.16	-1.258	2.7175e-05	0.000636766	FRMD3	FERM domain containing 3 [Source:HGNC Symbol;Acc:HGNC:24125]		protein_coding
ENSG00000224287	80.76	145.85	-0.845	1.9094e-05	0.000472668	MSL3P1	MSL complex subunit 3 pseudogene 1 [Source:HGNC Symbol;Acc:HGNC:17837]		transcribed_processed_pseudogene
ENSG00000165272	84.38	150.63	-0.829	1.4712e-05	0.00037954	AQP3	aquaporin 3 (Gill blood group) [Source:HGNC Symbol;Acc:HGNC:636]	GIL BLOOD GROUP	protein_coding
ENSG00000007237	133.14	214.11	-0.681	1.6105e-05	0.000406684	GAS7	growth arrest specific 7 [Source:HGNC Symbol;Acc:HGNC:4169]		protein_coding
ENSG00000266086	34.03	78.86	-1.189	2.773e-05	0.000644949	AC015813.2			protein_coding
ENSG00000100167	138.76	219.49	-0.658	2.7703e-05	0.000644948	SEPT3	septin 3 [Source:HGNC Symbol;Acc:HGNC:10750]		protein_coding
ENSG00000248383	31.51	74.16	-1.209	5.5418e-05	0.00117029	PCDHAC1	protocadherin alpha subfamily C, 1 [Source:HGNC Symbol;Acc:HGNC:8676]		protein_coding
ENSG00000283782	113.52	186.08	-0.708	3.8287e-05	0.000853065	AC116366.3			protein_coding
ENSG00000196159	102.2	171.07	-0.738	3.5332e-05	0.000795412	FAT4	FAT atypical cadherin 4 [Source:HGNC Symbol;Acc:HGNC:23109]	periventricular neuronal heterotopia,Cerebro-facio-articular syndrome,Hennekam syndrome,HENNEKAM LYMPHANGIECTASIA-LYMPHEDEMA SYNDROME 2,Van Maldergem syndrome 2	protein_coding
ENSG00000208892	69.38	126.96	-0.862	4.1446e-05	0.000910767	SNORA49	small nucleolar RNA, H/ACA box 49 [Source:HGNC Symbol;Acc:HGNC:32642]		snoRNA
ENSG00000165029	44.07	91.45	-1.037	6.4281e-05	0.00132808	ABCA1	ATP binding cassette subfamily A member 1 [Source:HGNC Symbol;Acc:HGNC:29]	APOLIPOPROTEIN A-I DEFICIENCY,TANGIER DISEASE,HYPERCHOLESTEROLEMIA FAMILIAL,HYPOALPHALIPOPROTEINEMIA PRIMARY	protein_coding
ENSG00000105808	91.28	155.53	-0.762	4.2364e-05	0.000925772	RASA4	RAS p21 protein activator 4 [Source:HGNC Symbol;Acc:HGNC:23181]		protein_coding
ENSG00000201512	151.89	232.4	-0.61	5.2314e-05	0.00111264	SNORA71C	small nucleolar RNA, H/ACA box 71C [Source:HGNC Symbol;Acc:HGNC:32656]		snoRNA
ENSG00000164494	144.39	222.72	-0.622	4.3842e-05	0.000954555	PDSS2	decaprenyl diphosphate synthase subunit 2 [Source:HGNC Symbol;Acc:HGNC:23041]	COENZYME Q10 DEFICIENCY PRIMARY 3,Leigh syndrome with nephrotic syndrome	protein_coding
ENSG00000079482	79.7	139.87	-0.804	6.3146e-05	0.00130804	OPHN1	oligophrenin 1 [Source:HGNC Symbol;Acc:HGNC:8148]	MENTAL RETARDATION X-LINKED OPHN1-RELATED,X-linked intellectual disability-cerebellar hypoplasia syndrome,Mental retardation X-linked with cerebellar hypoplasia and distinctive facial appearance	protein_coding
ENSG00000142599	106.89	175.38	-0.709	6.1294e-05	0.00127408	RERE	arginine-glutamic acid dipeptide repeats [Source:HGNC Symbol;Acc:HGNC:9965]	Phenocopy of Proximal 1p36 Deletions,1p36 deletion syndrome,RERE-related neurodevelopmental syndrome,NEURODEVELOPMENTAL DISORDER WITH OR WITHOUT ANOMALIES OF THE BRAIN EYE OR HEART	protein_coding
ENSG00000138792	43.13	89.3	-1.033	7.692e-05	0.00155554	ENPEP	glutamyl aminopeptidase [Source:HGNC Symbol;Acc:HGNC:3355]		protein_coding
ENSG00000196782	44.07	90.38	-1.02	8.745e-05	0.00173469	MAML3	mastermind like transcriptional coactivator 3 [Source:HGNC Symbol;Acc:HGNC:16272]		protein_coding
ENSG00000044459	63.76	117.28	-0.869	9.9947e-05	0.00195015	CNTLN	centlein [Source:HGNC Symbol;Acc:HGNC:23432]		protein_coding
ENSG00000128590	127.1	199.39	-0.646	7.9088e-05	0.00159129	DNAJB9	DnaJ heat shock protein family (Hsp40) member B9 [Source:HGNC Symbol;Acc:HGNC:6968]		protein_coding
ENSG00000152782	128.8	201.13	-0.639	8.7533e-05	0.00173488	PANK1	pantothenate kinase 1 [Source:HGNC Symbol;Acc:HGNC:8598]		protein_coding
ENSG00000166262	38.44	81.13	-1.058	0.000100574	0.001956	FAM227B	family with sequence similarity 227 member B [Source:HGNC Symbol;Acc:HGNC:26543]		protein_coding
ENSG00000169330	70.32	124.81	-0.819	9.9931e-05	0.00195015	KIAA1024	KIAA1024 [Source:HGNC Symbol;Acc:HGNC:29172]		protein_coding
ENSG00000128699	147.2	222.72	-0.594	9.1627e-05	0.00180851	ORMDL1	ORMDL sphingolipid biosynthesis regulator 1 [Source:HGNC Symbol;Acc:HGNC:16036]		protein_coding
ENSG00000108370	60.01	110.82	-0.874	0.000118211	0.00224771	RGS9	regulator of G protein signaling 9 [Source:HGNC Symbol;Acc:HGNC:10004]	Bradyopsia,PROLONGED ELECTRORETINAL RESPONSE SUPPRESSION	protein_coding
ENSG00000258644	74.44	130.17	-0.798	0.000107446	0.00206439	SYNJ2BP-COX16	SYNJ2BP-COX16 readthrough [Source:HGNC Symbol;Acc:HGNC:48350]		protein_coding
ENSG00000163297	136.89	209.81	-0.612	0.000105173	0.00202586	ANTXR2	anthrax toxin receptor 2 [Source:HGNC Symbol;Acc:HGNC:21732]	INFANTILE SYSTEMIC HYALINOSIS,JUVENILE HYALINE FIBROMATOSIS,HYALINE FIBROMATOSIS SYNDROME	protein_coding
ENSG00000133740	90.21	150.75	-0.734	0.000102745	0.00199171	E2F5	E2F transcription factor 5 [Source:HGNC Symbol;Acc:HGNC:3119]		protein_coding
ENSG00000124374	137.83	210.88	-0.61	0.00011016	0.00211049	PAIP2B	poly(A) binding protein interacting protein 2B [Source:HGNC Symbol;Acc:HGNC:29200]		protein_coding
ENSG00000281490	50.98	97.94	-0.929	0.000146277	0.00265042	CICP14	capicua transcriptional repressor pseudogene 14 [Source:HGNC Symbol;Acc:HGNC:38542]		processed_pseudogene
ENSG00000254726	90.01	149.56	-0.726	0.000129866	0.00239675	MEX3A	mex-3 RNA binding family member A [Source:HGNC Symbol;Acc:HGNC:33482]		protein_coding
ENSG00000284292	31.86	69.33	-1.098	0.000295951	0.0048538	AC004922.1			protein_coding
ENSG00000146411	71.1	123.71	-0.791	0.000180514	0.0031627	SLC2A12	solute carrier family 2 member 12 [Source:HGNC Symbol;Acc:HGNC:18067]		protein_coding
ENSG00000111700	100.47	161.27	-0.677	0.00019194	0.00333596	SLCO1B3	solute carrier organic anion transporter family member 1B3 [Source:HGNC Symbol;Acc:HGNC:10961]	Rotor syndrome,HYPERBILIRUBINEMIA ROTOR TYPE	protein_coding
ENSG00000252213	44.07	86.08	-0.95	0.000289537	0.00475842	SNORA74D	small nucleolar RNA, H/ACA box 74D [Source:HGNC Symbol;Acc:HGNC:52219]		snoRNA
ENSG00000147180	107.82	168.92	-0.643	0.000296535	0.00486004	ZNF711	zinc finger protein 711 [Source:HGNC Symbol;Acc:HGNC:13128]	MENTAL RETARDATION X-LINKED ZNF711-RELATED,X-linked non-syndromic intellectual disability,MENTAL RETARDATION X-LINKED 97	protein_coding
ENSG00000155324	98.45	157.09	-0.669	0.000265454	0.00441739	GRAMD2B	GRAM domain containing 2B [Source:HGNC Symbol;Acc:HGNC:24911]		protein_coding
ENSG00000182771	47.79	90.36	-0.905	0.000440567	0.00679151	GRID1	glutamate ionotropic receptor delta type subunit 1 [Source:HGNC Symbol;Acc:HGNC:4575]		protein_coding
ENSG00000140323	39.53	78.49	-0.972	0.000597861	0.00868865	DISP2	dispatched RND transporter family member 2 [Source:HGNC Symbol;Acc:HGNC:19712]		protein_coding
ENSG00000157107	88.13	143.1	-0.693	0.000359502	0.00572301	FCHO2	FCH domain only 2 [Source:HGNC Symbol;Acc:HGNC:25180]		protein_coding
ENSG00000137834	89.07	144.18	-0.689	0.000381539	0.00602161	SMAD6	SMAD family member 6 [Source:HGNC Symbol;Acc:HGNC:6772]	Familial bicuspid aortic valve,AORTIC VALVE DISEASE 2,Craniosynostosis 7	protein_coding
ENSG00000156804	41.25	80.7	-0.951	0.000371376	0.00588847	FBXO32	F-box protein 32 [Source:HGNC Symbol;Acc:HGNC:16731]		protein_coding
ENSG00000182732	46.88	88.23	-0.898	0.000527314	0.00784481	RGS6	regulator of G protein signaling 6 [Source:HGNC Symbol;Acc:HGNC:10002]		protein_coding
ENSG00000014914	68.44	116.2	-0.755	0.000496591	0.00748116	MTMR11	myotubularin related protein 11 [Source:HGNC Symbol;Acc:HGNC:24307]		protein_coding
ENSG00000120093	68.44	116.2	-0.755	0.000496591	0.00748116	HOXB3	homeobox B3 [Source:HGNC Symbol;Acc:HGNC:5114]		protein_coding
ENSG00000144935	50.63	92.53	-0.857	0.000585116	0.00853461	TRPC1	transient receptor potential cation channel subfamily C member 1 [Source:HGNC Symbol;Acc:HGNC:12333]		protein_coding
ENSG00000128000	104.07	161.47	-0.629	0.000556479	0.00819768	ZNF780B	zinc finger protein 780B [Source:HGNC Symbol;Acc:HGNC:33109]		protein_coding
ENSG00000129595	33.58	68.49	-1.007	0.000986511	0.0129703	EPB41L4A	erythrocyte membrane protein band 4.1 like 4A [Source:HGNC Symbol;Acc:HGNC:13278]		protein_coding
ENSG00000166046	74.19	123.02	-0.722	0.000591057	0.00860548	TCP11L2	t-complex 11 like 2 [Source:HGNC Symbol;Acc:HGNC:28627]		protein_coding
ENSG00000263585	52.49	94.45	-0.835	0.000639797	0.00920837	AC145207.4			antisense
ENSG00000272752	78.26	127.84	-0.701	0.000605742	0.00879766	STAG3L5P-PVRIG2P-PILRB	STAG3L5P-PVRIG2P-PILRB readthrough [Source:HGNC Symbol;Acc:HGNC:48898]		processed_transcript
ENSG00000116106	76.88	125.88	-0.704	0.000715517	0.0100912	EPHA4	EPH receptor A4 [Source:HGNC Symbol;Acc:HGNC:3388]	Amyotrophic lateral sclerosis	protein_coding
ENSG00000120832	57.19	100.06	-0.796	0.000749851	0.0104703	MTERF2	mitochondrial transcription termination factor 2 [Source:HGNC Symbol;Acc:HGNC:30779]		protein_coding
ENSG00000114841	72.19	119.43	-0.718	0.000827566	0.011343	DNAH1	dynein axonemal heavy chain 1 [Source:HGNC Symbol;Acc:HGNC:2940]	Non-syndromic male infertility due to sperm motility disorder,Primary ciliary dyskinesia,CILIARY DYSKINESIA PRIMARY 37,SPERMATOGENIC FAILURE 18	protein_coding
ENSG00000212907	47.82	87.15	-0.852	0.000999449	0.0131043	MT-ND4L	mitochondrially encoded NADH:ubiquinone oxidoreductase core subunit 4L [Source:HGNC Symbol;Acc:HGNC:7460]	Leber hereditary optic neuropathy,LEBER OPTIC ATROPHY	protein_coding
ENSG00000116574	74.07	121.58	-0.707	0.000745898	0.0104334	RHOU	ras homolog family member U [Source:HGNC Symbol;Acc:HGNC:17794]		protein_coding
ENSG00000188549	75.01	122.66	-0.702	0.000794414	0.0109705	CCDC9B	coiled-coil domain containing 9B [Source:HGNC Symbol;Acc:HGNC:33488]		protein_coding
ENSG00000153234	76.88	124.81	-0.692	0.000897766	0.0121517	NR4A2	nuclear receptor subfamily 4 group A member 2 [Source:HGNC Symbol;Acc:HGNC:7981]	Parkinson disease late-onset	protein_coding
ENSG00000283515	61.24	104.56	-0.762	0.000794028	0.0109705	AC020915.5			protein_coding
ENSG00000132394	45.78	83.92	-0.86	0.00109253	0.0140544	EEFSEC	eukaryotic elongation factor, selenocysteine-tRNA specific [Source:HGNC Symbol;Acc:HGNC:24614]		protein_coding
ENSG00000207496	89.9	141	-0.644	0.000961239	0.0128289	SNORA7A	small nucleolar RNA, H/ACA box 7A [Source:HGNC Symbol;Acc:HGNC:32592]		snoRNA
ENSG00000175155	80.63	129.11	-0.673	0.00113074	0.014437	YPEL2	yippee like 2 [Source:HGNC Symbol;Acc:HGNC:18326]		protein_coding
ENSG00000267322	47.38	85.52	-0.839	0.000913166	0.0123252	SNHG22	small nucleolar RNA host gene 22 [Source:HGNC Symbol;Acc:HGNC:50285]		antisense
ENSG00000244693	90.31	140.93	-0.636	0.000961239	0.0128289	CTAGE8	CTAGE family member 8 [Source:HGNC Symbol;Acc:HGNC:37294]		protein_coding
ENSG00000151176	76.88	123.73	-0.679	0.00112332	0.0143808	PLBD2	phospholipase B domain containing 2 [Source:HGNC Symbol;Acc:HGNC:27283]		protein_coding
ENSG00000226065	69.63	114.22	-0.706	0.00145623	0.0177932	ZBTB45P2	zinc finger and BTB domain containing 45 pseudogene 2 [Source:HGNC Symbol;Acc:HGNC:49228]		processed_pseudogene
ENSG00000185483	71.26	116.2	-0.698	0.0012323	0.0155425	ROR1	receptor tyrosine kinase like orphan receptor 1 [Source:HGNC Symbol;Acc:HGNC:10256]	Autosomal recessive non-syndromic sensorineural deafness type DFNB,DEAFNESS AUTOSOMAL RECESSIVE 108	protein_coding
ENSG00000276077	65.55	108.86	-0.723	0.001428	0.017547	CU633904.1	uncharacterized LOC102724951 [Source:NCBI gene;Acc:102724951]		lincRNA
ENSG00000182253	100.43	152.5	-0.598	0.00126959	0.0158625	SYNM	synemin [Source:HGNC Symbol;Acc:HGNC:24466]		protein_coding
ENSG00000125430	38.44	72.58	-0.9	0.00115099	0.0146642	HS3ST3B1	heparan sulfate-glucosamine 3-sulfotransferase 3B1 [Source:HGNC Symbol;Acc:HGNC:5198]		protein_coding
ENSG00000171791	36.57	69.94	-0.917	0.00184008	0.0213361	BCL2	BCL2, apoptosis regulator [Source:HGNC Symbol;Acc:HGNC:990]	Follicular lymphoma,High grade B-cell lymphoma with MYC and/ or BCL2 and/or BCL6 rearrangement,Intravascular large B-cell lymphoma	protein_coding
ENSG00000184384	67.51	110.82	-0.707	0.00161911	0.0193026	MAML2	mastermind like transcriptional coactivator 2 [Source:HGNC Symbol;Acc:HGNC:16259]		protein_coding
ENSG00000182580	62.82	104.37	-0.723	0.00187826	0.0216213	EPHB3	EPH receptor B3 [Source:HGNC Symbol;Acc:HGNC:3394]		protein_coding
ENSG00000104213	67.98	110.82	-0.697	0.00161911	0.0193026	PDGFRL	platelet derived growth factor receptor like [Source:HGNC Symbol;Acc:HGNC:8805]	Adult hepatocellular carcinoma,Hepatocellular Carcinoma	protein_coding
ENSG00000173480	82.53	128.9	-0.637	0.00192747	0.0220283	ZNF417	zinc finger protein 417 [Source:HGNC Symbol;Acc:HGNC:20646]		protein_coding
ENSG00000171843	98.45	148.48	-0.588	0.00172707	0.020332	MLLT3	MLLT3, super elongation complex subunit [Source:HGNC Symbol;Acc:HGNC:7136]	Acute myeloid leukemia with t(9;11)(p22;q23)	protein_coding
ENSG00000228672	52.51	90.38	-0.772	0.00248671	0.0267299	PROB1	proline rich basic protein 1 [Source:HGNC Symbol;Acc:HGNC:41906]		protein_coding
ENSG00000169891	69.38	111.9	-0.682	0.0017205	0.0202743	REPS2	RALBP1 associated Eps domain containing 2 [Source:HGNC Symbol;Acc:HGNC:9963]		protein_coding
ENSG00000274750	54.38	92.53	-0.756	0.00163125	0.0194051	HIST1H3E	histone cluster 1 H3 family member e [Source:HGNC Symbol;Acc:HGNC:4769]		protein_coding
ENSG00000123384	86.02	132.34	-0.616	0.00223113	0.0246033	LRP1	LDL receptor related protein 1 [Source:HGNC Symbol;Acc:HGNC:6692]	Atrophoderma vermiculata,Keratosis follicularis spinulosa decalvans,KERATOSIS PILARIS ATROPHICANS	protein_coding
ENSG00000170653	77.44	121.6	-0.644	0.00174393	0.0204772	ATF7	activating transcription factor 7 [Source:HGNC Symbol;Acc:HGNC:792]		protein_coding
ENSG00000143847	50.63	87.15	-0.772	0.00275426	0.0289027	PPFIA4	PTPRF interacting protein alpha 4 [Source:HGNC Symbol;Acc:HGNC:9248]		protein_coding
ENSG00000107614	65.63	106.52	-0.69	0.00226208	0.0248641	TRDMT1	tRNA aspartic acid methyltransferase 1 [Source:HGNC Symbol;Acc:HGNC:2977]		protein_coding
ENSG00000187957	39.38	72.09	-0.856	0.00223829	0.024648	DNER	delta/notch like EGF repeat containing [Source:HGNC Symbol;Acc:HGNC:24456]		protein_coding
ENSG00000128596	59.07	97.91	-0.719	0.00231739	0.0253089	CCDC136	coiled-coil domain containing 136 [Source:HGNC Symbol;Acc:HGNC:22225]		protein_coding
ENSG00000116874	52.51	89.3	-0.755	0.00317177	0.0322496	WARS2	tryptophanyl tRNA synthetase 2, mitochondrial [Source:HGNC Symbol;Acc:HGNC:12730]	Autosomal recessive non-syndromic intellectual disability,NEURODEVELOPMENTAL DISORDER MITOCHONDRIAL WITH ABNORMAL MOVEMENTS AND LACTIC ACIDOSIS WITH OR WITHOUT SEIZURES	protein_coding
ENSG00000005238	92.82	139.87	-0.586	0.00250772	0.026883	FAM214B	family with sequence similarity 214 member B [Source:HGNC Symbol;Acc:HGNC:25666]		protein_coding
ENSG00000070731	45.61	80	-0.797	0.00312553	0.0319693	ST6GALNAC2	ST6 N-acetylgalactosaminide alpha-2,6-sialyltransferase 2 [Source:HGNC Symbol;Acc:HGNC:10867]		protein_coding
ENSG00000169762	62.82	102.21	-0.694	0.00297692	0.0307126	TAPT1	transmembrane anterior posterior transformation 1 [Source:HGNC Symbol;Acc:HGNC:26887]	COMPLEX LETHAL OSTEOCHONDRODYSPLASIA,OSTEOCHONDRODYSPLASIA COMPLEX LETHAL SYMOENS-BARNES-GISTELINCK TYPE	protein_coding
ENSG00000234648	49.24	84.7	-0.77	0.00237175	0.025735	AL162151.2			processed_pseudogene
ENSG00000148408	42.19	75.32	-0.821	0.00292806	0.0303265	CACNA1B	calcium voltage-gated channel subunit alpha1 B [Source:HGNC Symbol;Acc:HGNC:1389]	Dystonia 23	protein_coding
ENSG00000164124	86.26	131.26	-0.6	0.00273411	0.028704	TMEM144	transmembrane protein 144 [Source:HGNC Symbol;Acc:HGNC:25633]		protein_coding
ENSG00000007341	55.71	92.61	-0.723	0.00305438	0.0313626	ST7L	suppression of tumorigenicity 7 like [Source:HGNC Symbol;Acc:HGNC:18441]		protein_coding
ENSG00000155792	77.82	120.51	-0.624	0.00281474	0.0293953	DEPTOR	DEP domain containing MTOR interacting protein [Source:HGNC Symbol;Acc:HGNC:22953]		protein_coding
ENSG00000091844	51.57	87.15	-0.746	0.0037702	0.0368922	RGS17	regulator of G protein signaling 17 [Source:HGNC Symbol;Acc:HGNC:14088]		protein_coding
ENSG00000175106	59.25	96.67	-0.697	0.00293048	0.0303384	TVP23C	trans-golgi network vesicle protein 23 homolog C [Source:HGNC Symbol;Acc:HGNC:30453]		protein_coding
ENSG00000273033	64.69	103.29	-0.667	0.00417112	0.0397123	LINC02035	long intergenic non-protein coding RNA 2035 [Source:HGNC Symbol;Acc:HGNC:52875]		lincRNA
ENSG00000198840	36.57	66.71	-0.85	0.00423246	0.0400949	MT-ND3	mitochondrially encoded NADH:ubiquinone oxidoreductase core subunit 3 [Source:HGNC Symbol;Acc:HGNC:7458]	Isolated complex I deficiency,Leber plus disease,Maternally-inherited Leigh syndrome	protein_coding
ENSG00000200394	36.57	66.71	-0.85	0.00423246	0.0400949	SNORA38B	small nucleolar RNA, H/ACA box 38B [Source:HGNC Symbol;Acc:HGNC:33617]		snoRNA
ENSG00000100968	37.5	67.78	-0.837	0.00461844	0.0427004	NFATC4	nuclear factor of activated T cells 4 [Source:HGNC Symbol;Acc:HGNC:7778]		protein_coding
ENSG00000163710	44.07	76.39	-0.78	0.00445492	0.0416403	PCOLCE2	procollagen C-endopeptidase enhancer 2 [Source:HGNC Symbol;Acc:HGNC:8739]		protein_coding
ENSG00000169031	68.44	107.59	-0.645	0.00317185	0.0322496	COL4A3	collagen type IV alpha 3 chain [Source:HGNC Symbol;Acc:HGNC:2204]	Alport syndrome autosomal dominant,ALPORT SYNDROME AUTOSOMAL RECESSIVE,Autosomal dominant Alport syndrome,Autosomal recessive Alport syndrome,Familial idiopathic steroid-resistant nephrotic syndrome with focal segmental hyalinosis,HEMATURIA BENIGN FAMILIAL	protein_coding
ENSG00000163995	51.57	86.08	-0.728	0.00478614	0.0439275	ABLIM2	actin binding LIM protein family member 2 [Source:HGNC Symbol;Acc:HGNC:19195]		protein_coding
ENSG00000198237	48.32	81.75	-0.747	0.00363391	0.0358863	AC131392.1			unprocessed_pseudogene
ENSG00000196295	70.32	109.53	-0.632	0.00353307	0.0350414	AC005154.1			processed_transcript
ENSG00000116815	46.88	79.62	-0.752	0.00433071	0.0408215	CD58	CD58 molecule [Source:HGNC Symbol;Acc:HGNC:1688]		protein_coding
ENSG00000247134	52.51	86.08	-0.703	0.00643465	0.0553134	AC090204.1			lincRNA
ENSG00000143341	38.44	67.78	-0.802	0.00461844	0.0427004	HMCN1	hemicentin 1 [Source:HGNC Symbol;Acc:HGNC:19194]	MACULAR DEGENERATION AGE-RELATED 1	protein_coding
ENSG00000213096	70.25	108.26	-0.617	0.00540085	0.0483846	ZNF254	zinc finger protein 254 [Source:HGNC Symbol;Acc:HGNC:13047]		protein_coding
ENSG00000223478	45.94	77.47	-0.741	0.00659086	0.0562308	AL441992.1			antisense
ENSG00000183840	49.69	82.07	-0.713	0.0067462	0.0571678	GPR39	G protein-coupled receptor 39 [Source:HGNC Symbol;Acc:HGNC:4496]		protein_coding
ENSG00000029534	57.19	91.45	-0.668	0.00647949	0.0555452	ANK1	ankyrin 1 [Source:HGNC Symbol;Acc:HGNC:492]	8p11.2 deletion syndrome,Hereditary spherocytosis,SPHEROCYTOSIS TYPE 1	protein_coding
ENSG00000130449	67.51	104.37	-0.621	0.00743364	0.0616613	ZSWIM6	zinc finger SWIM-type containing 6 [Source:HGNC Symbol;Acc:HGNC:29316]	Acromelic frontonasal dysostosis,Acromelic frontonasal dysplasia,NEURODEVELOPMENTAL DISORDER WITH MOVEMENT ABNORMALITIES ABNORMALGAIT AND AUTISTIC FEATURES	protein_coding
ENSG00000254837	45	75.65	-0.737	0.00615067	0.0535279	AP001372.2	uncharacterized LOC100287896 [Source:NCBI gene;Acc:100287896]		bidirectional_promoter_lncRNA
ENSG00000165113	44.07	74.24	-0.739	0.00732987	0.0610728	GKAP1	G kinase anchoring protein 1 [Source:HGNC Symbol;Acc:HGNC:17496]		protein_coding
ENSG00000221491	45	75.32	-0.73	0.00784643	0.0632565	SNORA2C	small nucleolar RNA, H/ACA box 2C [Source:HGNC Symbol;Acc:HGNC:32624]		snoRNA
ENSG00000267002	38.76	67.13	-0.777	0.00841684	0.0669057	AC060780.1			lincRNA
ENSG00000186529	46.8	77.47	-0.715	0.00893322	0.0701228	CYP4F3	cytochrome P450 family 4 subfamily F member 3 [Source:HGNC Symbol;Acc:HGNC:2646]		protein_coding
ENSG00000164010	40.16	68.86	-0.763	0.00704061	0.0591932	ERMAP	erythroblast membrane associated protein (Scianna blood group) [Source:HGNC Symbol;Acc:HGNC:15743]	BLOOD GROUP--SCIANNA SYSTEM,RADIN BLOOD GROUP ANTIGEN	protein_coding
ENSG00000035664	46.88	77.47	-0.713	0.00893322	0.0701228	DAPK2	death associated protein kinase 2 [Source:HGNC Symbol;Acc:HGNC:2675]		protein_coding
ENSG00000203943	59.69	93.61	-0.641	0.00762808	0.0625853	SAMD13	sterile alpha motif domain containing 13 [Source:HGNC Symbol;Acc:HGNC:24582]		protein_coding
ENSG00000239920	57.45	90.81	-0.651	0.00647949	0.0555452	AC104389.4	Hemoglobin subunit gamma-2 [Source:UniProtKB/Swiss-Prot;Acc:P69892]		protein_coding
ENSG00000176024	40.32	68.86	-0.758	0.00704061	0.0591932	ZNF613	zinc finger protein 613 [Source:HGNC Symbol;Acc:HGNC:25827]		protein_coding
ENSG00000182568	47.82	78.54	-0.704	0.00751943	0.0620979	SATB1	SATB homeobox 1 [Source:HGNC Symbol;Acc:HGNC:10541]		protein_coding
ENSG00000188223	62.96	97.42	-0.622	0.00887335	0.0697902	AD000671.1			protein_coding
ENSG00000139133	55.32	87.82	-0.657	0.00723648	0.060553	ALG10	ALG10, alpha-1,2-glucosyltransferase [Source:HGNC Symbol;Acc:HGNC:23162]	LONG QT SYNDROME 2	protein_coding
ENSG00000240356	42.74	71.69	-0.733	0.00873494	0.0689197	RPL23AP7	ribosomal protein L23a pseudogene 7 [Source:HGNC Symbol;Acc:HGNC:17336]		transcribed_processed_pseudogene
ENSG00000253958	36.57	63.48	-0.779	0.0120328	0.0881604	CLDN23	claudin 23 [Source:HGNC Symbol;Acc:HGNC:17591]		protein_coding
ENSG00000169246	45.69	75.26	-0.708	0.0106112	0.0805395	NPIPB3	nuclear pore complex interacting protein family member B3 [Source:HGNC Symbol;Acc:HGNC:28989]		protein_coding
ENSG00000177943	52.51	83.92	-0.666	0.0101139	0.0775543	MAMDC4	MAM domain containing 4 [Source:HGNC Symbol;Acc:HGNC:24083]		protein_coding
ENSG00000139946	53.44	85	-0.66	0.00808316	0.0647277	PELI2	pellino E3 ubiquitin protein ligase family member 2 [Source:HGNC Symbol;Acc:HGNC:8828]		protein_coding
ENSG00000213189	58.55	91.15	-0.63	0.0111213	0.0836197	BTF3L4P2	basic transcription factor 3 like 4 pseudogene 2 [Source:HGNC Symbol;Acc:HGNC:39646]		processed_pseudogene
ENSG00000167244	62.33	95.76	-0.612	0.00844769	0.0670839	IGF2	insulin like growth factor 2 [Source:HGNC Symbol;Acc:HGNC:5466]	BECKWITH-WIEDEMANN SYNDROME,Chromosome 11p15.5-Related Russell-Silver Syndrome,Beckwith-Wiedemann syndrome due to imprinting defect of 11p15,Isolated hemihyperplasia,Silver-Russell syndrome due to 11p15 microduplication,Silver-Russell syndrome due to a point mutation,Silver-Russell syndrome due to an imprinting defect of 11p15,Growth restriction severe with distinctive facies,SILVER-RUSSELL SYNDR…	protein_coding
ENSG00000165312	40.32	67.78	-0.735	0.00905782	0.0707286	OTUD1	OTU deubiquitinase 1 [Source:HGNC Symbol;Acc:HGNC:27346]		protein_coding
ENSG00000189280	40.32	67.78	-0.735	0.00905782	0.0707286	GJB5	gap junction protein beta 5 [Source:HGNC Symbol;Acc:HGNC:4287]		protein_coding
ENSG00000205795	48.75	78.54	-0.677	0.0100899	0.077395	CYS1	cystin 1 [Source:HGNC Symbol;Acc:HGNC:18525]		protein_coding
ENSG00000270069	59.07	91.45	-0.622	0.0111213	0.0836197	MIR222HG	MIR222 host gene [Source:HGNC Symbol;Acc:HGNC:49555]		lincRNA
ENSG00000206530	55.74	87.15	-0.636	0.0118496	0.0871398	CFAP44	cilia and flagella associated protein 44 [Source:HGNC Symbol;Acc:HGNC:25631]	Non-syndromic male infertility due to sperm motility disorder,SPERMATOGENIC FAILURE 20	protein_coding
ENSG00000196218	61.88	94.68	-0.606	0.0104227	0.0793608	RYR1	ryanodine receptor 1 [Source:HGNC Symbol;Acc:HGNC:10483]	MINICORE MYOPATHY WITH EXTERNAL OPHTHALMOPLEGIA,Autosomal dominant centronuclear myopathy,Benign Samaritan congenital myopathy,Central core disease,Congenital multicore myopathy with external ophthalmoplegia,Congenital myopathy with myasthenic-like onset,Exercise-induced malignant hyperthermia,King Denborough syndrome,Lethal multiple pterygium syndrome,Malignant hyperthermia of anesthesia,Moderat…	protein_coding
ENSG00000274333	65.26	98.61	-0.588	0.00975582	0.0751948	CU633967.1	uncharacterized LOC102724219 [Source:NCBI gene;Acc:102724219]		lincRNA
ENSG00000281344	41.25	68.31	-0.714	0.0124034	0.0903883	HELLPAR	HELLP associated long non-coding RNA [Source:HGNC Symbol;Acc:HGNC:43984]	HELLP syndrome	macro_lncRNA
ENSG00000257594	44.36	72.25	-0.691	0.0118497	0.0871398	GALNT4	polypeptide N-acetylgalactosaminyltransferase 4 [Source:HGNC Symbol;Acc:HGNC:4126]		protein_coding
ENSG00000204248	56.26	87.15	-0.622	0.0118496	0.0871398	COL11A2	collagen type XI alpha 2 chain [Source:HGNC Symbol;Acc:HGNC:2187]	AUTOSOMAL RECESSIVE OTOSPONDYLOMEGAEPIPHYSEAL DYSPLASIA,DEAFNESS AUTOSOMAL DOMINANT TYPE 13,DEAFNESS AUTOSOMAL RECESSIVE TYPE 53,STICKLER SYNDROME TYPE 3,WEISSENBACHER-ZWEYMUELLER SYNDROME,Autosomal dominant non-syndromic sensorineural deafness type DFNA,Autosomal recessive non-syndromic sensorineural deafness type DFNB,Fibrochondrogenesis,Otospondylomegaepiphyseal dysplasia,Weissenbacher-Zweymul…	protein_coding
ENSG00000235288	38.98	65.18	-0.727	0.013836	0.0980308	AC099329.1			antisense
ENSG00000135338	59.07	90.38	-0.605	0.0137117	0.0974683	LCA5	LCA5, lebercilin [Source:HGNC Symbol;Acc:HGNC:31923]	Leber congenital amaurosis,Severe early-childhood-onset retinal dystrophy,LEBER CONGENITAL AMAUROSIS 5	protein_coding
ENSG00000124107	41.25	67.78	-0.703	0.0124034	0.0903883	SLPI	secretory leukocyte peptidase inhibitor [Source:HGNC Symbol;Acc:HGNC:11092]		protein_coding
ENSG00000232098	43.13	69.94	-0.685	0.0140873	0.099398	AC012313.1			lincRNA
ENSG00000153157	38.94	64.56	-0.715	0.013836	0.0980308	SYCP2L	synaptonemal complex protein 2 like [Source:HGNC Symbol;Acc:HGNC:21537]		protein_coding
ENSG00000274512	49.98	78.43	-0.64	0.0166704	0.112112	TBC1D3L	TBC1 domain family member 3L [Source:HGNC Symbol;Acc:HGNC:51246]		protein_coding
ENSG00000205809	39.65	65.36	-0.707	0.0187406	0.122088	KLRC2	killer cell lectin like receptor C2 [Source:HGNC Symbol;Acc:HGNC:6375]		protein_coding
ENSG00000189362	56.26	86.08	-0.605	0.0146562	0.102413	NEMP2	nuclear envelope integral membrane protein 2 [Source:HGNC Symbol;Acc:HGNC:33700]		protein_coding
ENSG00000187626	56.02	85.72	-0.605	0.0146562	0.102413	ZKSCAN4	zinc finger with KRAB and SCAN domains 4 [Source:HGNC Symbol;Acc:HGNC:13854]		protein_coding
ENSG00000170775	58.13	88.23	-0.594	0.0160986	0.109479	GPR37	G protein-coupled receptor 37 [Source:HGNC Symbol;Acc:HGNC:4494]		protein_coding
ENSG00000161551	40.08	65.63	-0.698	0.0147792	0.103061	ZNF577	zinc finger protein 577 [Source:HGNC Symbol;Acc:HGNC:28673]		protein_coding
ENSG00000112796	59.07	89.3	-0.588	0.0168411	0.113046	ENPP5	ectonucleotide pyrophosphatase/phosphodiesterase 5 (putative) [Source:HGNC Symbol;Acc:HGNC:13717]		protein_coding
ENSG00000110002	47.82	75.32	-0.645	0.0186931	0.121978	VWA5A	von Willebrand factor A domain containing 5A [Source:HGNC Symbol;Acc:HGNC:6658]		protein_coding
ENSG00000214135	39.65	64.58	-0.69	0.0187406	0.122088	AC132008.2			transcribed_unprocessed_pseudogene
ENSG00000100055	42.19	67.78	-0.671	0.0167448	0.112526	CYTH4	cytohesin 4 [Source:HGNC Symbol;Acc:HGNC:9505]		protein_coding
ENSG00000231806	55.27	83.92	-0.594	0.017236	0.114793	PCAT7	prostate cancer associated transcript 7 (non-protein coding) [Source:HGNC Symbol;Acc:HGNC:48824]		antisense
ENSG00000174749	56.26	85	-0.587	0.0180558	0.119155	FAM241A	family with sequence similarity 241 member A [Source:HGNC Symbol;Acc:HGNC:26813]		protein_coding
ENSG00000155957	49.2	76.17	-0.62	0.0196771	0.126598	TMBIM4	transmembrane BAX inhibitor motif containing 4 [Source:HGNC Symbol;Acc:HGNC:24257]		protein_coding
ENSG00000235269	46.88	73.16	-0.631	0.0220824	0.137442	LINC02331	long intergenic non-protein coding RNA 2331 [Source:HGNC Symbol;Acc:HGNC:53251]		lincRNA
ENSG00000170293	52.51	79.62	-0.591	0.0238007	0.144739	CMTM8	CKLF like MARVEL transmembrane domain containing 8 [Source:HGNC Symbol;Acc:HGNC:19179]		protein_coding
ENSG00000153993	47.82	73.16	-0.603	0.0287028	0.166341	SEMA3D	semaphorin 3D [Source:HGNC Symbol;Acc:HGNC:10726]	Hirschsprung disease	protein_coding
ENSG00000119242	49.69	75.32	-0.59	0.0314089	0.174211	CCDC92	coiled-coil domain containing 92 [Source:HGNC Symbol;Acc:HGNC:29563]		protein_coding
ENSG00000188707	49.69	75.32	-0.59	0.0314089	0.174211	ZBED6CL	ZBED6 C-terminal like [Source:HGNC Symbol;Acc:HGNC:21720]		protein_coding
ENSG00000169814	41.32	64.85	-0.638	0.025021	0.150397	BTD	biotinidase [Source:HGNC Symbol;Acc:HGNC:1122]	BIOTINIDASE DEFICIENCY	protein_coding
ENSG00000059728	38.69	61.33	-0.651	0.0351998	0.18914	MXD1	MAX dimerization protein 1 [Source:HGNC Symbol;Acc:HGNC:6761]		protein_coding
ENSG00000110195	42.19	65.63	-0.625	0.0264232	0.157131	FOLR1	folate receptor 1 [Source:HGNC Symbol;Acc:HGNC:3791]	NEURODEGENERATION DUE TO CEREBRAL FOLATE TRANSPORT DEFICIENCY,Neurodegenerative syndrome due to cerebral folate transport deficiency	protein_coding
ENSG00000126803	43.13	65.63	-0.594	0.0346149	0.187327	HSPA2	heat shock protein family A (Hsp70) member 2 [Source:HGNC Symbol;Acc:HGNC:5235]		protein_coding
ENSG00000134285	41.25	62.4	-0.586	0.0482331	0.2361	FKBP11	FK506 binding protein 11 [Source:HGNC Symbol;Acc:HGNC:18624]		protein_coding
